# Supplementary material for: Breathing techniques to reduce symptoms in people with serious respiratory illness: a systematic review
Source: PubMed Central journal article supplement — Eur Respir Rev. 2024 Oct 30;33(174):240012. doi: 10.1183/16000617.0012-2024 (PMC11522968; doi:10.1183/16000617.0012-2024), 2024-10-30
Supplement: ERR-0012-2024.SUPPLEMENT.pdf [file ERR-0012-2024.SUPPLEMENT.pdf]

## Online supplement

### **Breathing techniques to reduce symptoms in people with serious respiratory illness: a systematic review**

#### **TABLE OF CONTENTS**

Systematic review protocol

Search Strategies

Supplementary Figure 1. Risk of bias summary: review authors' judgements about each risk of bias item for each included study.

Supplementary Figure 2. Forest plot for breathlessness (modified Medical Research Council scale score) for Yoga vs. usual care.

Supplementary Figure 3. Forest plot for breathlessness (CRQ dyspnoea domain score) breathing retraining added to exercise training vs exercise training.

Supplementary Figure 4. Forest plots for health-related quality of life (St George's Respiratory Questionnaire [SQRQ]) for breathing exercises vs. usual care.

Supplementary Figure 5. Forest plots for health-related quality of life (Chronic Respiratory Disease Questionnaire [CRQ] fatigue, emotional function and mastery domain scores) for breathing retraining with biofeedback added to exercise training vs. exercise training.

Supplementary Figure 6. Forest plots for health-related quality of life (St George's Respiratory Questionnaire [SQRQ]) for Yoga vs. usual care.

Supplementary Figure 7. Forest plot for health-related quality of life (COPD Assessment Test score) for Yoga vs. usual care.

Supplementary Figure 8. Forest plots for adverse events (number of participants with serious adverse and adverse events) for breathing exercises vs. usual care.

Supplementary Figure 9. Forest plot for adverse events (number of participants with hospital admission) for breathing exercises vs. usual care.

Supplementary Figure 10. Forest plot for adverse events (mortality) for breathing exercises vs. usual care.

Supplementary Figure 11. Forest plot for adverse events (number of participants with exacerbation) for breathing exercises added to exercise training vs. exercise training alone.

Supplementary Figure 12. Forest plot for adverse events (number of participants with exacerbation) for Yoga vs. usual care

Supplementary Table 1. AMSTAR-2: Quality assessment for systematic reviews

Supplementary Table 2. Participant and study characteristics grouped by participant diagnosis

Supplementary Table 3. Study inclusion and exclusion criteria

Supplementary Table 4. Descriptive results for critical outcome: Breathlessness

Supplementary Table 5. Descriptive results for important outcome: Health-related quality of life

Supplementary Table 6. Descriptive results for critical outcome: Adverse events

Supplementary Table 7. Sensitivity analyses.

List of included studies

List of included systematic reviews

**Systematic review protocol: Should breathing techniques be used to reduce symptoms in people with serious illness related to lung disease?**

Provided to European Respiratory Review editorial office in April 2023, to be held in confidence.

|   |                                                                                       |
|---|---------------------------------------------------------------------------------------|
| P | Adults with serious illness related to lung disease                                   |
| I | Breathing exercises                                                                   |
| C | No breathing exercises or sham/placebo intervention                                   |
| O | Critical: Breathlessness<br>Important: health-related quality of life, adverse events |

**Types of studies:** We will include randomised controlled trials. We will exclude crossover trials, as the intervention includes behavioural components where carryover of intervention effects to the second period may occur. We will only include crossover studies if pre-crossover data are available

Where a high-quality, relevant systematic review has been published (e.g. Cochrane Collaboration), this will be utilised in order to increase the efficiency of the guideline development process. The AMSTAR-2 checklist (Shea et al, BMJ 2017) will be used to appraise the quality of these existing reviews.

**Types of participants:** We will include adults with serious illness related to lung disease. Serious illness is defined as a condition that carries a high risk of mortality, negatively impacts quality of life and daily function, and/or is burdensome in symptoms, treatments, or caregiver stress (Kelley AS. J Palliat Med. 2014;17:985.)

For mixed studies (eg studies including those with malignant disease) we will ask the authors for data related to the participants with non-malignant disease only. If separate data are unable to be obtained then we will include studies only if  $\geq 80\%$  of participants have non-malignant disease.

**Types of interventions:** We will include any type of breathing exercises, either supervised or unsupervised. Breathing exercises will be defined as any technique that aims to alter the respiratory pattern. This could be achieved with or without external devices, and either during exercise or at rest. Examples include pursed lip breathing, deep breathing, ventilation-feedback training and yoga breathing. As responses to different types of breathing exercises may vary, these interventions will be assessed separately.

Trials where breathing exercises are combined with another training intervention (e.g. relaxation) will be included provided 50% or more of the training consisted of breathing exercises. Trials of respiratory muscle training will not be included, as these interventions aim to improve respiratory muscle strength, rather than alter the respiratory pattern.

**Types of comparisons:**

- breathing exercises versus no intervention
- breathing exercises versus sham/placebo intervention
- breathing exercises in addition to a standard intervention common to both groups

**Outcomes:**

Critical:

- Breathlessness, using relevant and validated tool. This may include measures at rest or during exercise, but exercise measures obtained before and after an intervention must be obtained at iso-workload.

Important:

- Health related quality of life, using any validated tool
- Adverse events, defined according to the investigators' definition.

Reporting one of more of the outcomes listed here in the trial is not an inclusion criterion for the review.

**Search methods:** We will identify trials from searches of the following databases:

- Cochrane Central Register of Controlled Trials (CENTRAL) (Cochrane Library) (latest issue);
- MEDLINE (Ovid) (1950 to date); and
- EMBASE (Ovid) (1974 to date).

We will first search for any relevant previous systematic reviews. Included studies in earlier reviews will be assessed for eligibility for inclusion in this review. Database searches will be undertaken (from time of publication of most recent review to date) to identify subsequently published studies for screening.

**Searching other resources:** We will check reference lists of all primary studies and review articles for additional references. We will search for errata or retractions from included studies published in full-text on PubMed and report the date this was done within the review.

**Assessment of risk of bias:** Two authors will independently assess risk of bias for each study using the Cochrane Collaboration's Risk of Bias (1) tool.

**Measures of treatment effect:** We will analyse dichotomous data as odds ratios (ORs). For continuous data, we will use mean differences (MDs) or standardised mean differences (SMDs). Where it is reported, we will use the change from baseline. Where the change from baseline is not reported, we will use the adjusted results or final score. We will enter data presented as a scale with a consistent direction of effect (e.g. health-related quality of life data). We will undertake meta-analyses only where this is meaningful, i.e. if the treatments, participants and the underlying clinical question are similar enough for pooling to make sense. We will narratively describe skewed data reported as medians and interquartile ranges. Where multiple trial arms are reported in a single trial, we will include only the relevant arms. If two comparisons are combined in the same meta-analysis, we will halve the control group to avoid double-counting.

**Dealing with missing data:** We will contact trial investigators or study sponsors in order to verify key study characteristics and obtain missing numerical outcome data where possible (e.g. when a study is identified as abstract only). Where this is not possible, and the missing data are thought to introduce serious bias, we will explore the impact of including such studies in the overall assessment of results by a sensitivity analysis.

**Assessment of heterogeneity:** We will use the  $I^2$  statistic to measure heterogeneity among the trials in each analysis. If we identify substantial heterogeneity, we will report it and explore possible causes by prespecified subgroup analysis.

**Assessment of reporting biases:** If we are able to pool more than 10 trials, we will create and examine a funnel plot to explore possible small study and publication biases.

**Data synthesis:** We will perform a pooled quantitative synthesis where the trials are clinically homogeneous. We will pool data using a random-effects model to incorporate between study heterogeneity into the meta-analysis. Where the trials are clinically heterogeneous, we will perform a narrative synthesis.

**Subgroup analysis:** No subgroup analyses will be performed, as there are unlikely to be sufficient data to draw meaningful conclusions.

**Sensitivity analysis:** We will perform sensitivity analyses to examine the effects of methodological quality on the pooled estimate by removing studies that are at high or unclear risk of bias for the domains of blinding and incomplete outcome data.

## Search Strategies

Database(s): Ovid MEDLINE(R) and Epub Ahead of Print, In-Process, In-Data-Review & Other Non-Indexed Citations, Daily and Versions

| # | Searches                                                                                                                                                                                                                                                                                                                                                                                                                                                                                                                                                                                                                                                                                                                                                                                                                                                                                                                                                                                                                                                                                                                                                                                                                                                                                                                                                       |
|---|----------------------------------------------------------------------------------------------------------------------------------------------------------------------------------------------------------------------------------------------------------------------------------------------------------------------------------------------------------------------------------------------------------------------------------------------------------------------------------------------------------------------------------------------------------------------------------------------------------------------------------------------------------------------------------------------------------------------------------------------------------------------------------------------------------------------------------------------------------------------------------------------------------------------------------------------------------------------------------------------------------------------------------------------------------------------------------------------------------------------------------------------------------------------------------------------------------------------------------------------------------------------------------------------------------------------------------------------------------------|
| 1 | lung diseases/ or "cystic adenomatoid malformation of lung, congenital"/ or cystic fibrosis/ or hepatopulmonary syndrome/ or lung abscess/ or lung diseases, interstitial/ or alveolitis, extrinsic allergic/ or bird fancier's lung/ or farmer's lung/ or silo filler's disease/ or trichosporonosis/ or anti-glomerular basement membrane disease/ or histiocytosis, langerhans-cell/ or eosinophilic granuloma/ or pneumoconiosis/ or anthracosis/ or anthracosilicosis/ or asbestosis/ or berylliosis/ or byssinosis/ or caplan syndrome/ or siderosis/ or silicosis/ or silicotuberculosis/ or pulmonary fibrosis/ or idiopathic pulmonary fibrosis/ or hamman-rich syndrome/ or idiopathic interstitial pneumonias/ or cryptogenic organizing pneumonia/ or sarcoidosis, pulmonary/ or hypertension, pulmonary/ or familial primary pulmonary hypertension/ or pulmonary arterial hypertension/ or Pulmonary Heart Disease/ or lung diseases, obstructive/ or asthma/ or asthma-chronic obstructive pulmonary disease overlap syndrome/ or bronchiolitis obliterans/ or cryptogenic organizing pneumonia/ or bronchitis, chronic/ or pulmonary disease, chronic obstructive/ or pulmonary emphysema/ or plasma cell granuloma, pulmonary/ or bronchial diseases/ or bronchiectasis/ or respiratory tract diseases/ or respiration disorders/ or dyspnea/ |
| 2 | (lung disease* or pulmonary disease* or cystic fibrosis or interstitial pneumoni* or extrinsic allergic alveolit* or hypersensitivity pneumoniti* or pneumoconios?s or anthracos?s or anthracosilicos?s or asbestos?s or beryllios?s or byssinos?s or beryllium disease* or caplan syndrome or bird fancier* lung or farmer* lung or silo filler* disease or trichosporonos?s or sideros?s or silicos?s or silicotuberculos?s or fibrosing alveolit* or pulmonary fibros?s or fibrocystic pulmonary dysplasia* or hamman-rich disease or hamman-rich syndrome or cryptogenic organizing pneumonia* or pulmonary sarcoidos?s or bronchiolitis obliterans or constrictive bronchiolit* or exudative bronchiolit* or chronic bronchitis or emphysema* or pulmonary inflammatory pseudotumo?r or pulmonary plasma cell granuloma* or bronchial disease* or bronchiectas?s).mp.                                                                                                                                                                                                                                                                                                                                                                                                                                                                                     |
| 3 | ((((chronic or severe* or unrelenting or obstructive) adj asthma*) or (chronic* obstruct* adj3 (lung* or airway* or pulmon* or bronch* or alveolit* or respiratory))))).mp.                                                                                                                                                                                                                                                                                                                                                                                                                                                                                                                                                                                                                                                                                                                                                                                                                                                                                                                                                                                                                                                                                                                                                                                    |
| 4 | (bronchopulmonary disease* or lung granulomatos?s or pneumopath* or pulmonary disorder* or acute pneumonitis or chronic fibrous pneumonia* or fibroid phthisis or interstitial cell pneumonia or interstitial plasma cell pneumonia or interstitial pneumocystic pneumonia or phthisis fibroidea or pneumonia interstitialis or interstitial fibros?s or lung fibros?s or interstitial fibros?s or alveolar fibros?s or respiratory granulomatos?s or pulmonary granulomatos?s or lung granulomatos?s or lung conios?s or pneumoconiotic lesion or pneumokonios?s or pneumono?onios?s or (airway obstructive disease* or obstructive airway disorder* or obstructive respiratory disease* or obstructive respiratory disorder* or pneumatosis pulmonum or interstitial syndrome)).mp.                                                                                                                                                                                                                                                                                                                                                                                                                                                                                                                                                                          |
| 5 | ((((lung or pulmonary) adj (arter* hypertens* or hypertens* or fixed hypertens* or capillary hemangiomas or veno-occlusive or venoocclusive or parenchyma* disease*)) or (corpulmonale or cor pulmonale or pulmonary cardiac disease* or pulmonary vascular obstructive disease* or obstructive pulmonary vascular disease*)).mp.                                                                                                                                                                                                                                                                                                                                                                                                                                                                                                                                                                                                                                                                                                                                                                                                                                                                                                                                                                                                                              |
| 6 | 1 or 2 or 3 or 4 or 5                                                                                                                                                                                                                                                                                                                                                                                                                                                                                                                                                                                                                                                                                                                                                                                                                                                                                                                                                                                                                                                                                                                                                                                                                                                                                                                                          |
| 7 | breathing exercises/ or qigong/                                                                                                                                                                                                                                                                                                                                                                                                                                                                                                                                                                                                                                                                                                                                                                                                                                                                                                                                                                                                                                                                                                                                                                                                                                                                                                                                |
| 8 | (Buteyko or Pranayam* or yoga* or papworth technique or papworth method* or breathing gymnastics or qigong or "ch'i kung" or "qi gong" or breathwork or breath work or holotropic breathing).mp.                                                                                                                                                                                                                                                                                                                                                                                                                                                                                                                                                                                                                                                                                                                                                                                                                                                                                                                                                                                                                                                                                                                                                               |
| 9 | (breath* adj3 (exercise* or train* or educat* or retrain* or reeducat* or technique*)).mp.                                                                                                                                                                                                                                                                                                                                                                                                                                                                                                                                                                                                                                                                                                                                                                                                                                                                                                                                                                                                                                                                                                                                                                                                                                                                     |

|    |                                                                                                                                                                                                                                                                           |
|----|---------------------------------------------------------------------------------------------------------------------------------------------------------------------------------------------------------------------------------------------------------------------------|
| 10 | (breath* adj3 (coaching or guidance or instruction* or teach* or taught or tutor* or lesson* or learn* or upskill* or reskill* or workshop* or work-shop* or course* or class* or seminar* or drills)).mp.                                                                |
| 11 | (respirat* adj (exercise* or training or educat* or retrain* or reeducat* or technique* or coaching or guidance or instruction* or teach* or tutor* or lesson* or reskill* or workshop* or work-shop* or drills)).mp.                                                     |
| 12 | ((pursed lip* or diaphragmatic or yogic or deep or slow or relaxation or relaxed) adj (breathing or respiration)).mp.                                                                                                                                                     |
| 13 | (Breathing control or respiration control or breathing man?uvers or breathing man?uvres).mp.                                                                                                                                                                              |
| 14 | (control* adj3 breath* adj5 (coaching or coached or educat* or guidance or instruction* or practi#e* or practi#ing or teach* or taught or tutor* or lesson* or learn* or upskill* or reskill* or workshop* or work-shop* or course* or class* or seminar* or drills)).mp. |
| 15 | ((breath* or respiratory) adj5 (physiotherap* or physical therap* or chest physiotherap* or chest physical therap*)).mp.                                                                                                                                                  |
| 16 | ((breath* adj2 pattern) and (computeri#ed feedback or biofeedback)).mp.                                                                                                                                                                                                   |
| 17 | (Ventilat* feedback or Ventilat* biofeedback or Ventilat* feed-back or Ventilat* bio-feedback).mp.                                                                                                                                                                        |
| 18 | ((breath* adj2 pattern) and (computeri#ed feedback or biofeedback or bio feed back or feedback)).mp.                                                                                                                                                                      |
| 19 | or/7-18                                                                                                                                                                                                                                                                   |
| 20 | 6 and 19                                                                                                                                                                                                                                                                  |
| 21 | (dyspn?e* or "short* of breath" or "urge* to breathe*" or breathless* or suffocat* or ("need for air" or "gasp* for air" or "gasp* to breathe" or "pant* for air") or (unsatisf* inspiration or inspiratory difficult* or expiratory difficult*)).mp.                     |
| 22 | ((labo?red or difficult*) adj3 breath*).mp.                                                                                                                                                                                                                               |
| 23 | (breath* adj1 (distress* or discomfort* or dysfunction*)).mp.                                                                                                                                                                                                             |
| 24 | (air adj3 (hunger or starv*)).mp.                                                                                                                                                                                                                                         |
| 25 | or/21-24                                                                                                                                                                                                                                                                  |
| 26 | 19 and 25                                                                                                                                                                                                                                                                 |
| 27 | 20 or 26                                                                                                                                                                                                                                                                  |
| 28 | (randomized controlled trial or controlled clinical trial).pt. or (randomi?ed or placebo).ab. or clinical trials as topic.sh. or randomly.ab. or trial.ti.                                                                                                                |
| 29 | ((cross over or crossover) adj (clinical study or clinical trial or design or method or study or trial or studies)).mp.                                                                                                                                                   |
| 30 | 28 or 29                                                                                                                                                                                                                                                                  |
| 31 | 27 and 30                                                                                                                                                                                                                                                                 |

Database(s): Embase

| #  | Searches                                                                                                                                                                                                                                                                                                                                                                                                                                                                                                                                                                                                                                                                                                                                                                                                                                                                   |
|----|----------------------------------------------------------------------------------------------------------------------------------------------------------------------------------------------------------------------------------------------------------------------------------------------------------------------------------------------------------------------------------------------------------------------------------------------------------------------------------------------------------------------------------------------------------------------------------------------------------------------------------------------------------------------------------------------------------------------------------------------------------------------------------------------------------------------------------------------------------------------------|
| 1  | lung disease/ or chronic lung disease/ or interstitial lung disease/ or interstitial syndrome/ or lung emphysema/ or lung fibrosis/ or lung sarcoidosis/ or obstructive lung disease/ or fibrosing alveolitis/ or interstitial pneumonia/ or pneumoconiosis/ or asthma/ or chronic obstructive lung disease/ or severe asthma/ or asthmatic state/ or severe persistent asthma/ or obstructive airway disease/ or occupational lung disease/ or anthracosis/ or asbestosis/ or berylliosis/ or bird breeder lung/ or byssinosis/ or farmer lung/ or occupational asthma/ or pigeon breeder lung/ or pneumoconiosis/ or silicosis/ or bronchus disease/ or bronchiectasis/ or lung granuloma/ or respiratory tract disease/ or dyspnea/                                                                                                                                     |
| 2  | (lung disease* or pulmonary disease* or cystic fibrosis or interstitial pneumoni* or extrinsic allergic alveolit* or hypersensitivity pneumoniti* or pneumoconios?s or anthracos?s or anthracosilicos?s or asbestos?s or beryllios?s or byssinos?s or beryllium disease* or caplan syndrome or bird fancier* lung or farmer* lung or silo filler* disease or trichosporonos?s or sideros?s or silicos?s or silicotuberculos?s or fibrosing alveolit* or pulmonary fibros?s or fibrocystic pulmonary dysplasia* or hamman-rich disease or hamman-rich syndrome or cryptogenic organizing pneumonia* or pulmonary sarcoidos?s or bronchiolitis obliterans or constrictive bronchiolit* or exudative bronchiolit* or chronic bronchitis or emphysema* or pulmonary inflammatory pseudotumo?r or pulmonary plasma cell granuloma* or bronchial disease* or bronchiectas?s).mp. |
| 3  | ((((chronic or severe* or unrelenting or obstructive) adj asthma*) or (chronic* obstruct* adj3 (lung* or airway* or pulmon* or bronch* or alveolit* or respiratory))))).mp.                                                                                                                                                                                                                                                                                                                                                                                                                                                                                                                                                                                                                                                                                                |
| 4  | (bronchopulmonary disease* or lung granulomatos?s or pneumopath* or pulmonary disorder* or acute pneumonitis or chronic fibrous pneumonia* or fibroid phthisis or interstitial cell pneumonia or interstitial plasma cell pneumonia or interstitial pneumocystic pneumonia or phthisis fibroidea or pneumonia interstitialis or interstitial fibros?s or lung fibros?s or interstitial fibros?s or alveolar fibros?s or respiratory granulomatos?s or pulmonary granulomatos?s or lung granulomatos?s or lung conios?s or pneumoconiotic lesion or pneumokonios?s or pneumono?onios?s or (airway obstructive disease* or obstructive airway disorder* or obstructive respiratory disease* or obstructive respiratory disorder* or pneumatosis pulmonum or interstitial syndrome)).mp.                                                                                      |
| 5  | ((((lung or pulmonary) adj (arter* hypertens* or hypertens* or fixed hypertens* or capillary hemangiomas or veno-occlusive or venoocclusive or parenchyma* disease*)) or (corpulmonale or cor pulmonale or pulmonary cardiac disease* or pulmonary vascular obstructive disease* or obstructive pulmonary vascular disease*)).mp.                                                                                                                                                                                                                                                                                                                                                                                                                                                                                                                                          |
| 6  | 1 or 2 or 3 or 4 or 5                                                                                                                                                                                                                                                                                                                                                                                                                                                                                                                                                                                                                                                                                                                                                                                                                                                      |
| 7  | breathing exercise/ or breathwork/ or buteyko breathing/ or pranayama/ or qigong/                                                                                                                                                                                                                                                                                                                                                                                                                                                                                                                                                                                                                                                                                                                                                                                          |
| 8  | (Buteyko or Pranayam* or yoga* or papworth technique or papworth method* or breathing gymnastics or qigong or "ch'i kung" or "qi gong" or breathwork or breath work or holotropic breathing).mp.                                                                                                                                                                                                                                                                                                                                                                                                                                                                                                                                                                                                                                                                           |
| 9  | (breath* adj3 (exercise* or train* or educat* or retrain* or reeducat* or technique*)).mp.                                                                                                                                                                                                                                                                                                                                                                                                                                                                                                                                                                                                                                                                                                                                                                                 |
| 10 | (breath* adj3 (coaching or guidance or instruction* or teach* or taught or tutor* or lesson* or learn* or upskill* or reskill* or workshop* or work-shop* or course* or class* or seminar* or drills)).mp.                                                                                                                                                                                                                                                                                                                                                                                                                                                                                                                                                                                                                                                                 |
| 11 | (respirat* adj (exercise* or training or educat* or retrain* or reeducat* or technique* or coaching or guidance or instruction* or teach* or tutor* or lesson* or reskill* or workshop* or work-shop* or drills)).mp.                                                                                                                                                                                                                                                                                                                                                                                                                                                                                                                                                                                                                                                      |
| 12 | ((pursed lip* or diaphragmatic or yogic or deep or slow or relaxation or relaxed) adj (breathing or respiration)).mp.                                                                                                                                                                                                                                                                                                                                                                                                                                                                                                                                                                                                                                                                                                                                                      |



|    |                                                                                                                                                                                                                                                                           |
|----|---------------------------------------------------------------------------------------------------------------------------------------------------------------------------------------------------------------------------------------------------------------------------|
| 13 | (Breathing control or respiration control or breathing man?uvers or breathing man?uvres).mp.                                                                                                                                                                              |
| 14 | (control* adj3 breath* adj5 (coaching or coached or educat* or guidance or instruction* or practi#e* or practi#ing or teach* or taught or tutor* or lesson* or learn* or upskill* or reskill* or workshop* or work-shop* or course* or class* or seminar* or drills)).mp. |
| 15 | ((breath* or respiratory) adj5 (physiotherap* or physical therap* or chest physiotherap* or chest physical therap*)).mp.                                                                                                                                                  |
| 16 | ((breath* adj2 pattern) and (computeri#ed feedback or biofeedback)).mp.                                                                                                                                                                                                   |
| 17 | (Ventilat* feedback or Ventilat* biofeedback or Ventilat* feed-back or Ventilat* bio-feedback).mp.                                                                                                                                                                        |
| 18 | ((breath* adj2 pattern) and (computeri#ed feedback or biofeedback or bio feed back or feedback)).mp.                                                                                                                                                                      |
| 19 | or/7-18                                                                                                                                                                                                                                                                   |
| 20 | 6 and 19                                                                                                                                                                                                                                                                  |
| 21 | (dyspn?e* or "short* of breath" or "urge* to breathe*" or breathless* or suffocat* or ("need for air" or "gasp* for air" or "gasp* to breathe" or "pant* for air") or (unsatisf* inspiration or inspiratory difficult* or expiratory difficult*)).mp.                     |
| 22 | ((labo?red or difficult*) adj3 breath*).mp.                                                                                                                                                                                                                               |
| 23 | (breath* adj1 (distress* or discomfort* or dysfunction*)).mp.                                                                                                                                                                                                             |
| 24 | (air adj3 (hunger or starv*)).mp.                                                                                                                                                                                                                                         |
| 25 | or/21-24                                                                                                                                                                                                                                                                  |
| 26 | 19 and 25                                                                                                                                                                                                                                                                 |
| 27 | 20 or 26                                                                                                                                                                                                                                                                  |
| 28 | randomized controlled trial/ or randomization/ or single blind procedure/ or double blind procedure/ or crossover procedure/ or placebo/ or prospective study/                                                                                                            |
| 29 | (randomi?ed controlled or RCT or randomly allocated or allocated randomly or random allocation or "allocated at random" or single blind* or double blind* or ((treble or triple) adj blind*) or placebo*).mp.                                                             |
| 30 | ((cross over or crossover) adj (clinical study or clinical trial or design or method or study or trial or studies)).mp.                                                                                                                                                   |
| 31 | or/28-30                                                                                                                                                                                                                                                                  |
| 32 | 27 and 31                                                                                                                                                                                                                                                                 |
| 33 | limit 27 to (randomized controlled trial or controlled clinical trial)                                                                                                                                                                                                    |
| 34 | 32 or 33                                                                                                                                                                                                                                                                  |

Database(s): EBM Reviews - Cochrane Central Register of Controlled Trials

| # | Searches                                                                                                                                                                                                                                                                                                                                                                                                                                                                                                                                                                                                                                                                                                                                                                                                                                                                                                                                                                                                                                                                                                                                                                                                                                                                                                                                                       |
|---|----------------------------------------------------------------------------------------------------------------------------------------------------------------------------------------------------------------------------------------------------------------------------------------------------------------------------------------------------------------------------------------------------------------------------------------------------------------------------------------------------------------------------------------------------------------------------------------------------------------------------------------------------------------------------------------------------------------------------------------------------------------------------------------------------------------------------------------------------------------------------------------------------------------------------------------------------------------------------------------------------------------------------------------------------------------------------------------------------------------------------------------------------------------------------------------------------------------------------------------------------------------------------------------------------------------------------------------------------------------|
| 1 | lung diseases/ or "cystic adenomatoid malformation of lung, congenital"/ or cystic fibrosis/ or hepatopulmonary syndrome/ or lung abscess/ or lung diseases, interstitial/ or alveolitis, extrinsic allergic/ or bird fancier's lung/ or farmer's lung/ or silo filler's disease/ or trichosporonosis/ or anti-glomerular basement membrane disease/ or histiocytosis, langerhans-cell/ or eosinophilic granuloma/ or pneumoconiosis/ or anthracosis/ or anthracosilicosis/ or asbestosis/ or berylliosis/ or byssinosis/ or caplan syndrome/ or siderosis/ or silicosis/ or silicotuberculosis/ or pulmonary fibrosis/ or idiopathic pulmonary fibrosis/ or hamman-rich syndrome/ or idiopathic interstitial pneumonias/ or cryptogenic organizing pneumonia/ or sarcoidosis, pulmonary/ or hypertension, pulmonary/ or familial primary pulmonary hypertension/ or pulmonary arterial hypertension/ or Pulmonary Heart Disease/ or lung diseases, obstructive/ or asthma/ or asthma-chronic obstructive pulmonary disease overlap syndrome/ or bronchiolitis obliterans/ or cryptogenic organizing pneumonia/ or bronchitis, chronic/ or pulmonary disease, chronic obstructive/ or pulmonary emphysema/ or plasma cell granuloma, pulmonary/ or bronchial diseases/ or bronchiectasis/ or respiratory tract diseases/ or respiration disorders/ or dyspnea/ |
| 2 | (lung disease* or pulmonary disease* or cystic fibrosis or interstitial pneumoni* or extrinsic allergic alveolit* or hypersensitivity pneumoniti* or pneumoconios?s or anthracos?s or anthracosilicos?s or asbestos?s or beryllios?s or byssinos?s or beryllium disease* or caplan syndrome or bird fancier* lung or farmer* lung or silo filler* disease or trichosporonos?s or sideros?s or silicos?s or silicotuberculos?s or fibrosing alveolit* or pulmonary fibros?s or fibrocystic pulmonary dysplasia* or hamman-rich disease or hamman-rich syndrome or cryptogenic organizing pneumonia* or pulmonary sarcoidos?s or bronchiolitis obliterans or constrictive bronchiolit* or exudative bronchiolit* or chronic bronchitis or emphysema* or pulmonary inflammatory pseudotumo?r or pulmonary plasma cell granuloma* or bronchial disease* or bronchiectas?s).mp.                                                                                                                                                                                                                                                                                                                                                                                                                                                                                     |
| 3 | ((((chronic or severe* or unrelenting or obstructive) adj asthma*) or (chronic* obstruct* adj3 (lung* or airway* or pulmon* or bronch* or alveolit* or respiratory))))).mp.                                                                                                                                                                                                                                                                                                                                                                                                                                                                                                                                                                                                                                                                                                                                                                                                                                                                                                                                                                                                                                                                                                                                                                                    |
| 4 | (bronchopulmonary disease* or lung granulomatos?s or pneumopath* or pulmonary disorder* or acute pneumonitis or chronic fibrous pneumonia* or fibroid phthisis or interstitial cell pneumonia or interstitial plasma cell pneumonia or interstitial pneumocystic pneumonia or phthisis fibroidea or pneumonia interstitialis or interstitial fibros?s or lung fibros?s or interstitial fibros?s or alveolar fibros?s or respiratory granulomatos?s or pulmonary granulomatos?s or lung granulomatos?s or lung conios?s or pneumoconiotic lesion or pneumokonios?s or pneumono?onios?s or (airway obstructive disease* or obstructive airway disorder* or obstructive respiratory disease* or obstructive respiratory disorder* or pneumatosis pulmonum or interstitial syndrome)).mp.                                                                                                                                                                                                                                                                                                                                                                                                                                                                                                                                                                          |
| 5 | ((((lung or pulmonary) adj (arter* hypertens* or hypertens* or fixed hypertens* or capillary hemangiomas or veno-occlusive or venoocclusive or parenchyma* disease*)) or (corpulmonale or cor pulmonale or pulmonary cardiac disease* or pulmonary vascular obstructive disease* or obstructive pulmonary vascular disease*)).mp.                                                                                                                                                                                                                                                                                                                                                                                                                                                                                                                                                                                                                                                                                                                                                                                                                                                                                                                                                                                                                              |
| 6 | 1 or 2 or 3 or 4 or 5                                                                                                                                                                                                                                                                                                                                                                                                                                                                                                                                                                                                                                                                                                                                                                                                                                                                                                                                                                                                                                                                                                                                                                                                                                                                                                                                          |
| 7 | breathing exercises/ or qigong/                                                                                                                                                                                                                                                                                                                                                                                                                                                                                                                                                                                                                                                                                                                                                                                                                                                                                                                                                                                                                                                                                                                                                                                                                                                                                                                                |
| 8 | (Buteyko or Pranayam* or yoga* or papworth technique or papworth method* or breathing gymnastics or qigong or "ch'i kung" or "qi gong" or breathwork or breath work or holotropic breathing).mp.                                                                                                                                                                                                                                                                                                                                                                                                                                                                                                                                                                                                                                                                                                                                                                                                                                                                                                                                                                                                                                                                                                                                                               |
| 9 | (breath* adj3 (exercise* or train* or educat* or retrain* or reeducat* or technique*)).mp.                                                                                                                                                                                                                                                                                                                                                                                                                                                                                                                                                                                                                                                                                                                                                                                                                                                                                                                                                                                                                                                                                                                                                                                                                                                                     |

|    |                                                                                                                                                                                                                                                                           |
|----|---------------------------------------------------------------------------------------------------------------------------------------------------------------------------------------------------------------------------------------------------------------------------|
| 10 | (breath* adj3 (coaching or guidance or instruction* or teach* or taught or tutor* or lesson* or learn* or upskill* or reskill* or workshop* or work-shop* or course* or class* or seminar* or drills)).mp.                                                                |
| 11 | (respirat* adj (exercise* or training or educat* or retrain* or reeducat* or technique* or coaching or guidance or instruction* or teach* or tutor* or lesson* or reskill* or workshop* or work-shop* or drills)).mp.                                                     |
| 12 | ((pursed lip* or diaphragmatic or yogic or deep or slow or relaxation or relaxed) adj (breathing or respiration)).mp.                                                                                                                                                     |
| 13 | (Breathing control or respiration control or breathing man?uvers or breathing man?uvres).mp.                                                                                                                                                                              |
| 14 | (control* adj3 breath* adj5 (coaching or coached or educat* or guidance or instruction* or practi#e* or practi#ing or teach* or taught or tutor* or lesson* or learn* or upskill* or reskill* or workshop* or work-shop* or course* or class* or seminar* or drills)).mp. |
| 15 | ((breath* or respiratory) adj5 (physiotherap* or physical therap* or chest physiotherap* or chest physical therap*)).mp.                                                                                                                                                  |
| 16 | ((breath* adj2 pattern) and (computeri#ed feedback or biofeedback)).mp.                                                                                                                                                                                                   |
| 17 | (Ventilat* feedback or Ventilat* biofeedback or Ventilat* feed-back or Ventilat* bio-feedback).mp.                                                                                                                                                                        |
| 18 | ((breath* adj2 pattern) and (computeri#ed feedback or biofeedback or bio feed back or feedback)).mp.                                                                                                                                                                      |
| 19 | or/7-18                                                                                                                                                                                                                                                                   |
| 20 | 6 and 19                                                                                                                                                                                                                                                                  |
| 21 | (dyspn?e* or "short* of breath" or "urge* to breathe*" or breathless* or suffocat* or ("need for air" or "gasp* for air" or "gasp* to breathe" or "pant* for air") or (unsatisf* inspiration or inspiratory difficult* or expiratory difficult*)).mp.                     |
| 22 | ((labo?red or difficult*) adj3 breath*).mp.                                                                                                                                                                                                                               |
| 23 | (breath* adj1 (distress* or discomfort* or dysfunction*)).mp.                                                                                                                                                                                                             |
| 24 | (air adj3 (hunger or starv*)).mp.                                                                                                                                                                                                                                         |
| 25 | or/21-24                                                                                                                                                                                                                                                                  |
| 26 | 19 and 25                                                                                                                                                                                                                                                                 |
| 27 | 20 or 26                                                                                                                                                                                                                                                                  |

|                      | Random sequence generation (selection bias) | Allocation concealment (selection bias) | Blinding of participants | Blinding of personnel | Blinding of outcome assessment (detection bias) | Incomplete outcome data (attrition bias) | Selective reporting (reporting bias) | Other bias |
|----------------------|---------------------------------------------|-----------------------------------------|--------------------------|-----------------------|-------------------------------------------------|------------------------------------------|--------------------------------------|------------|
| Agnihotri 2017       | ?                                           | ?                                       | ?                        | ?                     | ?                                               | ?                                        | ?                                    |            |
| Ambrosino 1981       | ?                                           | ?                                       | ?                        | ?                     | ?                                               | ?                                        | ?                                    |            |
| Andresson 2022       | ?                                           | ?                                       | ?                        | ?                     | ?                                               | ?                                        | ?                                    |            |
| Baskari 2022         | ?                                           | ?                                       | ?                        | ?                     | ?                                               | ?                                        | ?                                    |            |
| Bhatt 2016           | ?                                           | ?                                       | ?                        | ?                     | ?                                               | ?                                        | ?                                    |            |
| Bidwell 2012         | ?                                           | ?                                       | ?                        | ?                     | ?                                               | ?                                        | ?                                    |            |
| Bruton 2018a         | ?                                           | ?                                       | ?                        | ?                     | ?                                               | ?                                        | ?                                    |            |
| Bruton 2018b         | ?                                           | ?                                       | ?                        | ?                     | ?                                               | ?                                        | ?                                    |            |
| Cheyhan 2022         | ?                                           | ?                                       | ?                        | ?                     | ?                                               | ?                                        | ?                                    |            |
| Chan 2011            | ?                                           | ?                                       | ?                        | ?                     | ?                                               | ?                                        | ?                                    |            |
| Chauhan 1992         | ?                                           | ?                                       | ?                        | ?                     | ?                                               | ?                                        | ?                                    |            |
| Collins 2008         | ?                                           | ?                                       | ?                        | ?                     | ?                                               | ?                                        | ?                                    |            |
| Collins 2014         | ?                                           | ?                                       | ?                        | ?                     | ?                                               | ?                                        | ?                                    |            |
| Collins 2019         | ?                                           | ?                                       | ?                        | ?                     | ?                                               | ?                                        | ?                                    |            |
| Cooper 2003          | ?                                           | ?                                       | ?                        | ?                     | ?                                               | ?                                        | ?                                    |            |
| Cousson 2022         | ?                                           | ?                                       | ?                        | ?                     | ?                                               | ?                                        | ?                                    |            |
| Dehordi 2021         | ?                                           | ?                                       | ?                        | ?                     | ?                                               | ?                                        | ?                                    |            |
| Donsky 2012          | ?                                           | ?                                       | ?                        | ?                     | ?                                               | ?                                        | ?                                    |            |
| Feng 2010a           | ?                                           | ?                                       | ?                        | ?                     | ?                                               | ?                                        | ?                                    |            |
| Feng 2010b           | ?                                           | ?                                       | ?                        | ?                     | ?                                               | ?                                        | ?                                    |            |
| Feng 2016            | ?                                           | ?                                       | ?                        | ?                     | ?                                               | ?                                        | ?                                    |            |
| Fluge 1994           | ?                                           | ?                                       | ?                        | ?                     | ?                                               | ?                                        | ?                                    |            |
| Georga 2019          | ?                                           | ?                                       | ?                        | ?                     | ?                                               | ?                                        | ?                                    |            |
| Girodo 1992          | ?                                           | ?                                       | ?                        | ?                     | ?                                               | ?                                        | ?                                    |            |
| Grammatopoulou 2011  | ?                                           | ?                                       | ?                        | ?                     | ?                                               | ?                                        | ?                                    |            |
| Ou 2018a             | ?                                           | ?                                       | ?                        | ?                     | ?                                               | ?                                        | ?                                    |            |
| Ou 2018b             | ?                                           | ?                                       | ?                        | ?                     | ?                                               | ?                                        | ?                                    |            |
| Ouzta 2015           | ?                                           | ?                                       | ?                        | ?                     | ?                                               | ?                                        | ?                                    |            |
| Holloway 2007        | ?                                           | ?                                       | ?                        | ?                     | ?                                               | ?                                        | ?                                    |            |
| Kaminsky 2017        | ?                                           | ?                                       | ?                        | ?                     | ?                                               | ?                                        | ?                                    |            |
| Katlyar 2006         | ?                                           | ?                                       | ?                        | ?                     | ?                                               | ?                                        | ?                                    |            |
| Lathadevi 2012       | ?                                           | ?                                       | ?                        | ?                     | ?                                               | ?                                        | ?                                    |            |
| Laurino 2012         | ?                                           | ?                                       | ?                        | ?                     | ?                                               | ?                                        | ?                                    |            |
| Lausin 2009          | ?                                           | ?                                       | ?                        | ?                     | ?                                               | ?                                        | ?                                    |            |
| Lee 2022             | ?                                           | ?                                       | ?                        | ?                     | ?                                               | ?                                        | ?                                    |            |
| Lehrer 1997          | ?                                           | ?                                       | ?                        | ?                     | ?                                               | ?                                        | ?                                    |            |
| Lehrer 2004          | ?                                           | ?                                       | ?                        | ?                     | ?                                               | ?                                        | ?                                    |            |
| Li 2002              | ?                                           | ?                                       | ?                        | ?                     | ?                                               | ?                                        | ?                                    |            |
| Li 2018              | ?                                           | ?                                       | ?                        | ?                     | ?                                               | ?                                        | ?                                    |            |
| Lin 2012             | ?                                           | ?                                       | ?                        | ?                     | ?                                               | ?                                        | ?                                    |            |
| Lin 2019             | ?                                           | ?                                       | ?                        | ?                     | ?                                               | ?                                        | ?                                    |            |
| Liu 2013             | ?                                           | ?                                       | ?                        | ?                     | ?                                               | ?                                        | ?                                    |            |
| Meuret 2007          | ?                                           | ?                                       | ?                        | ?                     | ?                                               | ?                                        | ?                                    |            |
| Nese 2022            | ?                                           | ?                                       | ?                        | ?                     | ?                                               | ?                                        | ?                                    |            |
| Nield 2007           | ?                                           | ?                                       | ?                        | ?                     | ?                                               | ?                                        | ?                                    |            |
| Opat 2000            | ?                                           | ?                                       | ?                        | ?                     | ?                                               | ?                                        | ?                                    |            |
| Ozer 2021            | ?                                           | ?                                       | ?                        | ?                     | ?                                               | ?                                        | ?                                    |            |
| Peng 2022            | ?                                           | ?                                       | ?                        | ?                     | ?                                               | ?                                        | ?                                    |            |
| Pourdowlat 2019      | ?                                           | ?                                       | ?                        | ?                     | ?                                               | ?                                        | ?                                    |            |
| Prasanna 2015        | ?                                           | ?                                       | ?                        | ?                     | ?                                               | ?                                        | ?                                    |            |
| Prem 2013a           | ?                                           | ?                                       | ?                        | ?                     | ?                                               | ?                                        | ?                                    |            |
| Prem 2013b           | ?                                           | ?                                       | ?                        | ?                     | ?                                               | ?                                        | ?                                    |            |
| Pustpa 2018          | ?                                           | ?                                       | ?                        | ?                     | ?                                               | ?                                        | ?                                    |            |
| Ranjita 2016         | ?                                           | ?                                       | ?                        | ?                     | ?                                               | ?                                        | ?                                    |            |
| Sabina 2005          | ?                                           | ?                                       | ?                        | ?                     | ?                                               | ?                                        | ?                                    |            |
| Sakhaei 2018         | ?                                           | ?                                       | ?                        | ?                     | ?                                               | ?                                        | ?                                    |            |
| Sangeethalakami 2022 | ?                                           | ?                                       | ?                        | ?                     | ?                                               | ?                                        | ?                                    |            |
| Salpatty 2016        | ?                                           | ?                                       | ?                        | ?                     | ?                                               | ?                                        | ?                                    |            |
| Saunders 1965        | ?                                           | ?                                       | ?                        | ?                     | ?                                               | ?                                        | ?                                    |            |
| Shen L 2021          | ?                                           | ?                                       | ?                        | ?                     | ?                                               | ?                                        | ?                                    |            |
| Singh 2012           | ?                                           | ?                                       | ?                        | ?                     | ?                                               | ?                                        | ?                                    |            |
| Slader 2006          | ?                                           | ?                                       | ?                        | ?                     | ?                                               | ?                                        | ?                                    |            |
| Sodhi 2014           | ?                                           | ?                                       | ?                        | ?                     | ?                                               | ?                                        | ?                                    |            |
| Soni 2012            | ?                                           | ?                                       | ?                        | ?                     | ?                                               | ?                                        | ?                                    |            |
| Sun 2003             | ?                                           | ?                                       | ?                        | ?                     | ?                                               | ?                                        | ?                                    |            |
| Tang 2016            | ?                                           | ?                                       | ?                        | ?                     | ?                                               | ?                                        | ?                                    |            |
| Turan 2020           | ?                                           | ?                                       | ?                        | ?                     | ?                                               | ?                                        | ?                                    |            |
| van Gestel 2012      | ?                                           | ?                                       | ?                        | ?                     | ?                                               | ?                                        | ?                                    |            |
| Vedanthan 1998       | ?                                           | ?                                       | ?                        | ?                     | ?                                               | ?                                        | ?                                    |            |
| Vempati 2009         | ?                                           | ?                                       | ?                        | ?                     | ?                                               | ?                                        | ?                                    |            |
| Wu 2006              | ?                                           | ?                                       | ?                        | ?                     | ?                                               | ?                                        | ?                                    |            |
| Yamaguchi 2012       | ?                                           | ?                                       | ?                        | ?                     | ?                                               | ?                                        | ?                                    |            |
| Yan 1996             | ?                                           | ?                                       | ?                        | ?                     | ?                                               | ?                                        | ?                                    |            |
| Yekefallah 2019      | ?                                           | ?                                       | ?                        | ?                     | ?                                               | ?                                        | ?                                    |            |
| Yuca 2020            | ?                                           | ?                                       | ?                        | ?                     | ?                                               | ?                                        | ?                                    |            |
| Zakerimoghadam 2011  | ?                                           | ?                                       | ?                        | ?                     | ?                                               | ?                                        | ?                                    |            |
| Zhang 2008a          | ?                                           | ?                                       | ?                        | ?                     | ?                                               | ?                                        | ?                                    |            |
| Zhang 2008b          | ?                                           | ?                                       | ?                        | ?                     | ?                                               | ?                                        | ?                                    |            |

Supplementary Figure 1. Risk of bias summary: review authors' judgements about each risk of bias item for each included study.

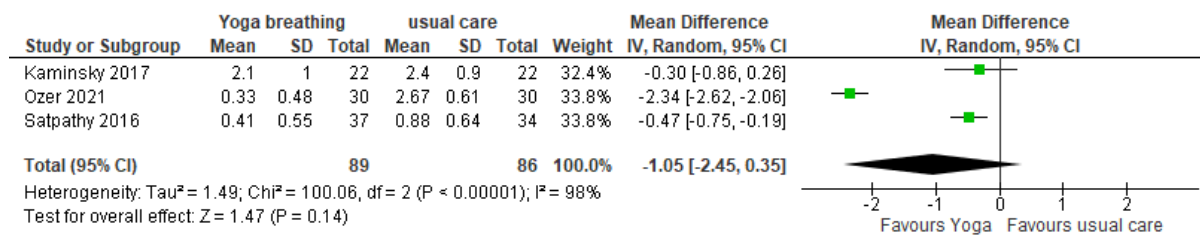

Supplementary Figure 2. Forest plot for breathlessness (modified Medical Research Council scale score) for Yoga vs. usual care.

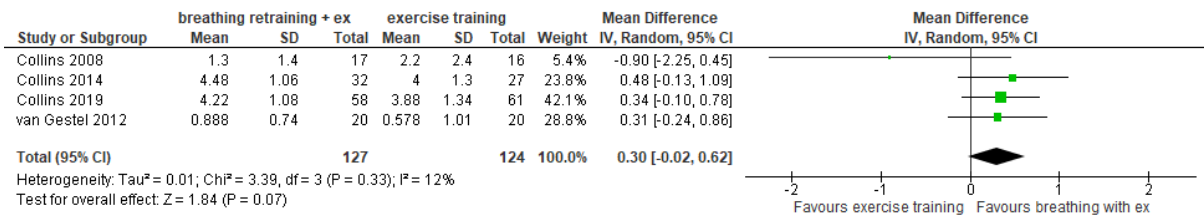

Supplementary Figure 3. Forest plot for breathlessness (CRQ dyspnoea domain score) breathing retraining added to exercise training vs exercise training

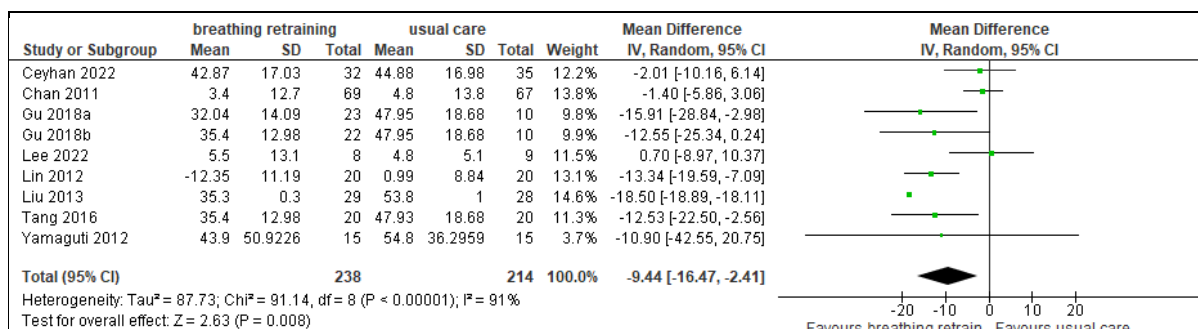

Supplementary Figure 4.1 SGRQ total score

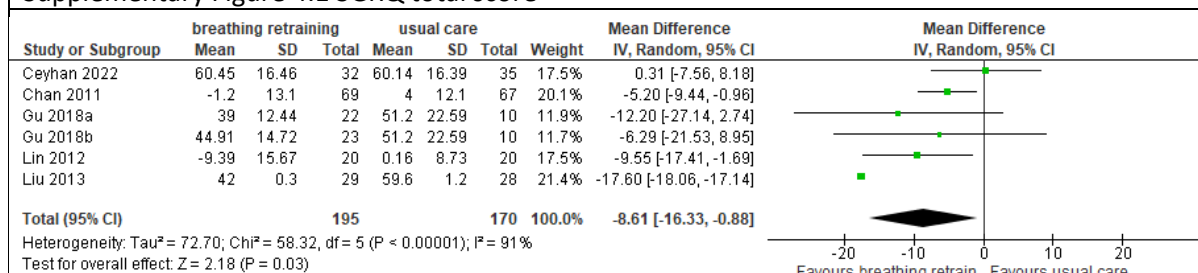

Supplementary Figure 4.2 SGRQ symptoms domain score

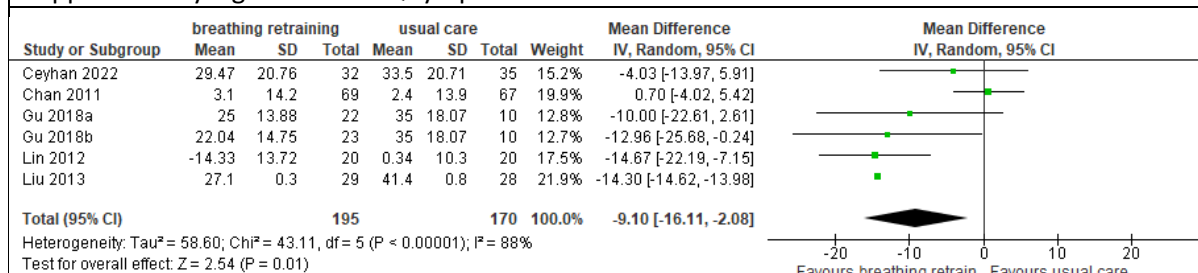

Supplementary Figure 4.3 SGRQ impact domain score

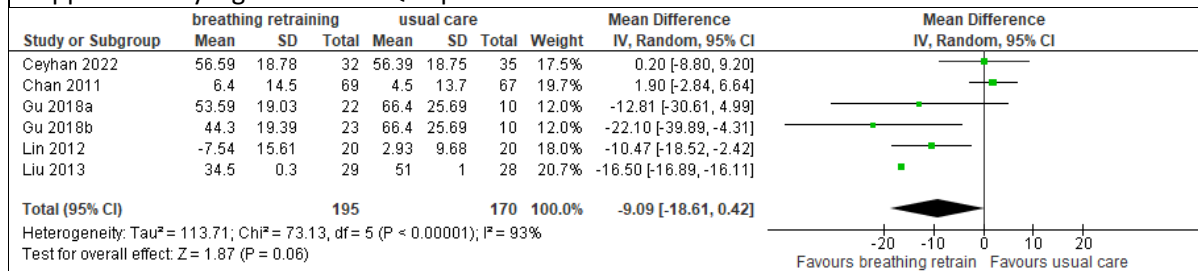

Supplementary Figure 4.4 SGRQ activities domain score

Supplementary Figure 4. Forest plots for health-related quality of life (St George's Respiratory Questionnaire [SQRQ]) for breathing exercises vs. usual care.

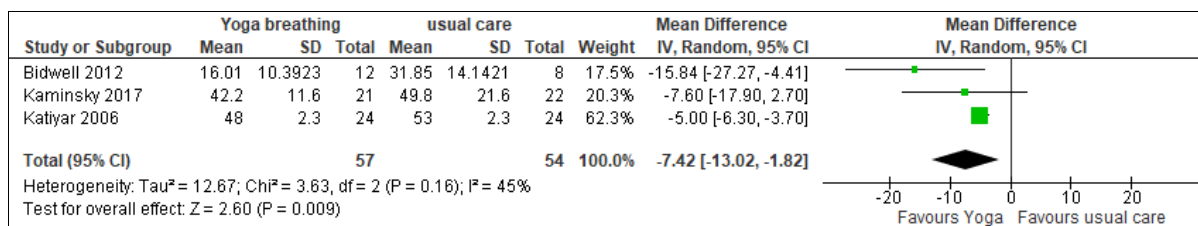

Supplementary Figure 5.1 SGRQ total score

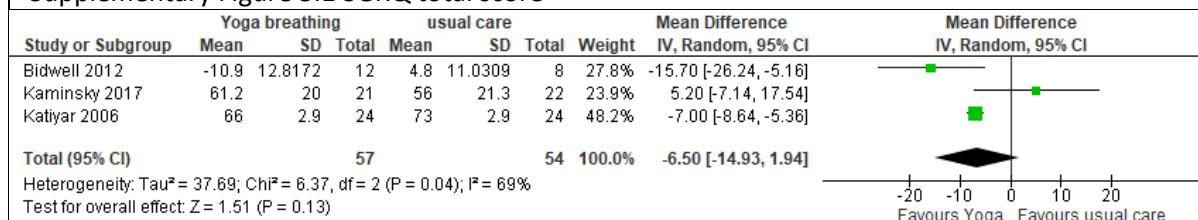

Supplementary Figure 5.2 SGRQ symptoms domain score

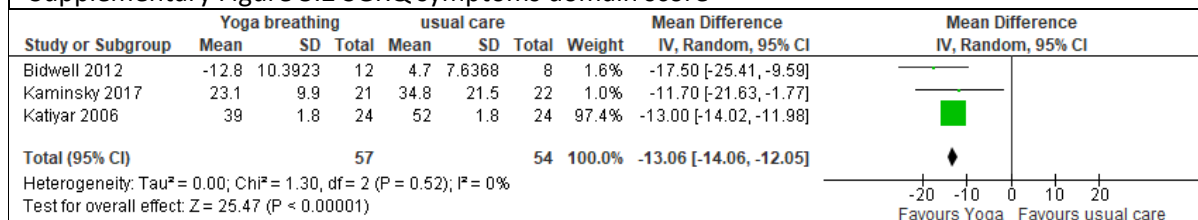

Supplementary Figure 5.3 SGRQ impact domain score

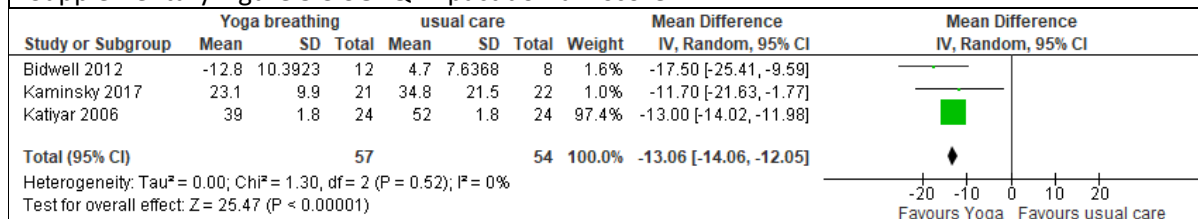

Supplementary Figure 5.4 SGRQ activities domain score

Supplementary Figure 5. Forest plots for health-related quality of life (St George's Respiratory Questionnaire [SQRQ]) for Yoga vs. usual care.



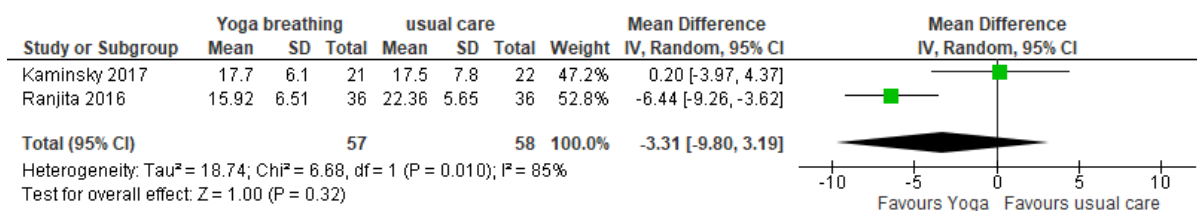

Supplementary Figure 6. Forest plot for health-related quality of life (COPD Assessment Test score) for Yoga vs. usual care.

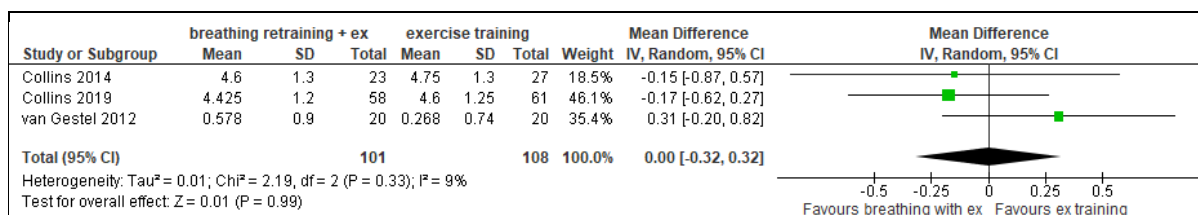

Supplementary Figure 7.1 CRQ fatigue domain score

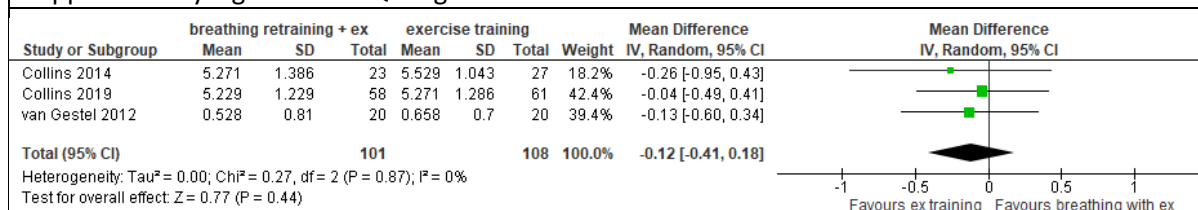

Supplementary Figure 7.2 CRQ emotional function domain score

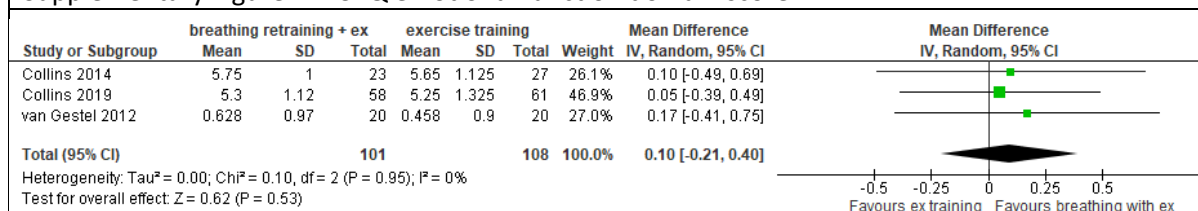

Supplementary Figure 7.3 CRQ mastery domain score

Supplementary Figure 7. Forest plots for health-related quality of life (Chronic Respiratory Disease Questionnaire [CRQ] fatigue, emotional function and mastery domain scores) for breathing retraining with biofeedback added to exercise training vs. exercise training.

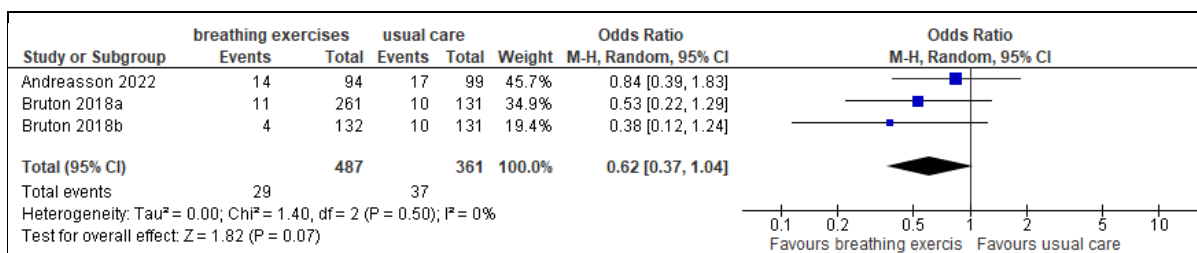

Supplementary Figure 8.1 Serious adverse events

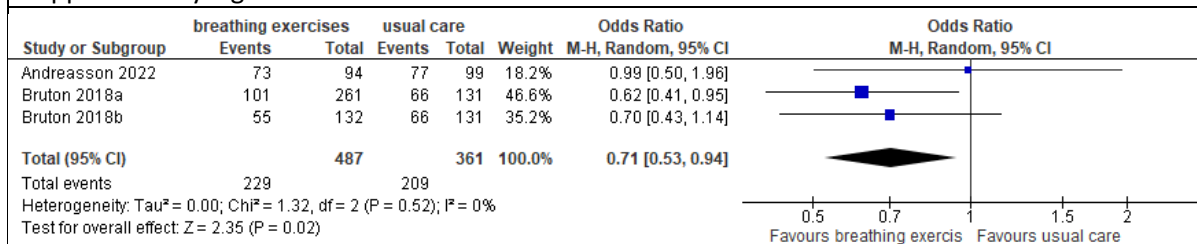

Supplementary Figure 8.2 Adverse events

Supplementary Figure 8. Forest plots for adverse events (number of participants with serious adverse and adverse events) for breathing exercises vs. usual care.

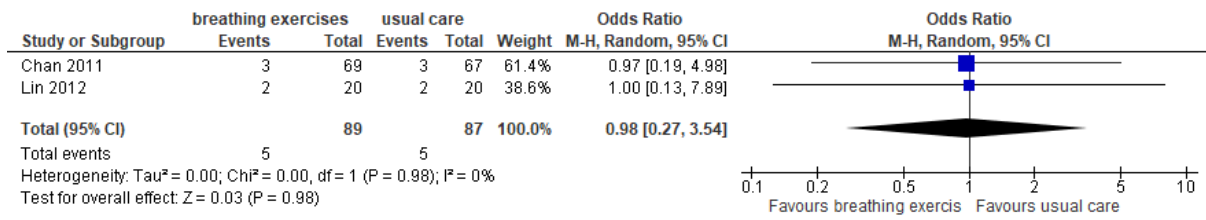

Supplementary Figure 9. Forest plot for adverse events (number of participants with hospital admission) for breathing exercises vs. usual care.

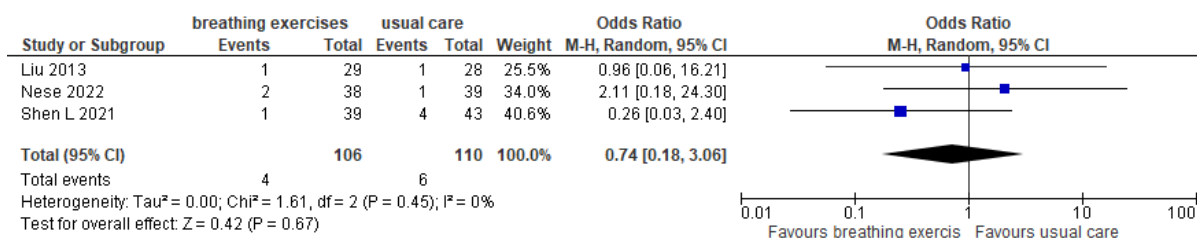

Supplementary Figure 10. Forest plot for adverse events (mortality) for breathing exercises vs. usual care.

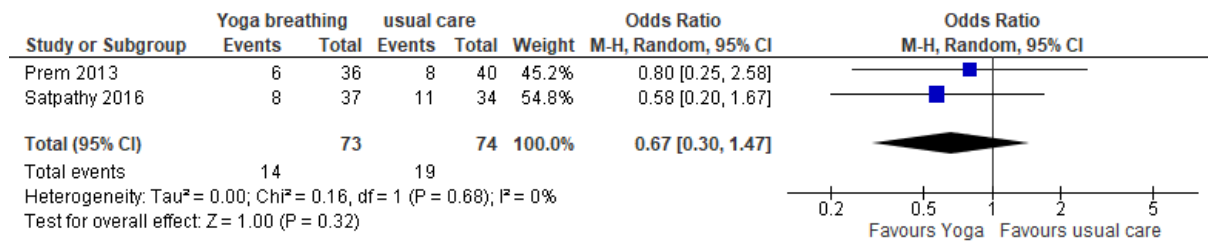

Supplementary Figure 11. Forest plot for adverse events (number of participants with exacerbation) for Yoga vs. usual care

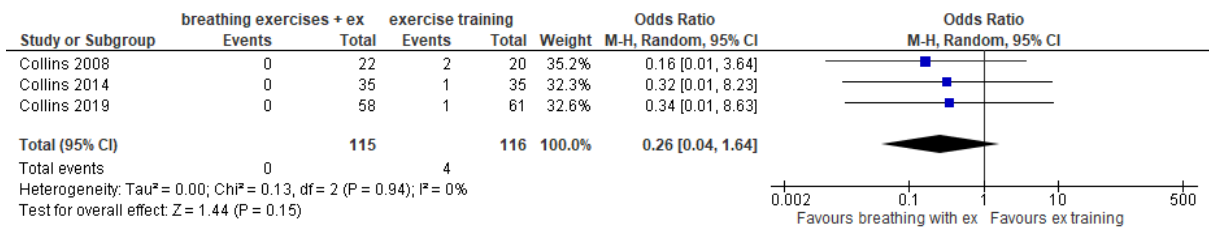

Supplementary Figure 12. Forest plot for adverse events (number of participants with exacerbation) for breathing exercises added to exercise training vs. exercise training alone.

Supplementary Table 1. AMSTAR-2: Quality assessment for systematic reviews

|                                                                                                                                                                                                                    | Burgess 2011             | Hindelang 2020           | Holland 2012 | Jayawardena 2020 | Santino 2020 | Xu 2022                  | Yang 2016 | Yang 2020                |
|--------------------------------------------------------------------------------------------------------------------------------------------------------------------------------------------------------------------|--------------------------|--------------------------|--------------|------------------|--------------|--------------------------|-----------|--------------------------|
| 1. Did the research questions and inclusion criteria for the review include the components of PICO?                                                                                                                | No <sup>a</sup>          | Yes                      | Yes          | Yes              | Yes          | Yes                      | Yes       | No <sup>a</sup>          |
| 2. Did the report of the review contain an explicit statement that the review methods were established prior to the conduct of the review and did the report justify any significant deviations from the protocol? | No                       | No                       | Yes          | No               | Yes          | No                       | Yes       | No                       |
| 3. Did the review authors explain their selection of the study designs for inclusion in the review?                                                                                                                | Yes                      | No                       | Yes          | No               | No           | No                       | No        | No                       |
| 4. Did the review authors use a comprehensive literature search strategy?                                                                                                                                          | partial yes <sup>b</sup> | partial yes <sup>d</sup> | Yes          | d                | Yes          | partial yes <sup>b</sup> | Yes       | partial yes <sup>b</sup> |
| 4. Did the review authors perform study selection in duplicate?                                                                                                                                                    | Yes                      | not described            | Yes          | Yes              | Yes          | Yes                      | Yes       | not described            |
| 6. Did the review authors perform data                                                                                                                                                                             | not described            | not described            | Yes          | No               | Yes          | Yes                      | Yes       | Yes                      |



|                                                                                                                                      |                          |                  |     |                          |     |     |     |                          |
|--------------------------------------------------------------------------------------------------------------------------------------|--------------------------|------------------|-----|--------------------------|-----|-----|-----|--------------------------|
| extraction in duplicate?                                                                                                             |                          |                  |     |                          |     |     |     |                          |
| 7. Did the review authors provide a list of excluded studies and justify the exclusions?                                             | No                       | No               | Yes | No                       | Yes | No  | Yes | No                       |
| 8. Did the review authors describe the included studies in adequate detail?                                                          | partial yes <sup>c</sup> | Yes              | Yes | partial yes <sup>c</sup> | Yes | Yes | Yes | partial yes <sup>c</sup> |
| 9. Did the review authors use a satisfactory technique for assessing the RoB in individual studies that were included in the review? | No                       | Yes              | Yes | Yes                      | Yes | Yes | Yes | Yes                      |
| 10. Did the review authors report on the sources of funding for the studies included in the review?                                  | No                       | No               | No  | No                       | Yes | Yes | No  | No                       |
| 11. If MAs were performed did the review authors use appropriate methods for statistical combination of results?                     | Yes                      | no meta-analysis | Yes | no meta-analysis         | Yes | Yes | Yes | Yes                      |
| 12. If MAs were performed, did the review authors assess                                                                             | No                       | no meta-analysis | Yes | no meta-analysis         | Yes | Yes | Yes | No                       |

|                                                                                                                                                                                         |     |                  |     |                  |     |     |     |     |
|-----------------------------------------------------------------------------------------------------------------------------------------------------------------------------------------|-----|------------------|-----|------------------|-----|-----|-----|-----|
| the potential impact of RoB in individual studies on the results of the MAs or other evidence synthesis?                                                                                |     |                  |     |                  |     |     |     |     |
| 13. Did the review authors account for RoB in individual studies when interpreting/ discussing the results of the review?                                                               | No  | No               | Yes | No               | Yes | No  | Yes | No  |
| 14. Did the review authors provide a satisfactory explanation for, and discussion of, any heterogeneity observed in the results of the review?                                          | Yes | Yes              | Yes | Yes              | Yes | Yes | Yes | Yes |
| 14. If they performed quantitative synthesis did the review authors carry out an adequate investigation of publication bias and discuss its likely impact on the results of the review? | No  | no meta-analysis | Yes | no meta-analysis | Yes | No  | Yes | No  |
| 16. Did the review authors report any potential sources of conflict of interest,                                                                                                        | Yes | Yes              | Yes | Yes              | Yes | Yes | Yes | Yes |

|                                                                |  |  |  |  |  |  |  |  |
|----------------------------------------------------------------|--|--|--|--|--|--|--|--|
| including any funding they received for conducting the review? |  |  |  |  |  |  |  |  |
|----------------------------------------------------------------|--|--|--|--|--|--|--|--|

<sup>a</sup>did not define comparator; <sup>b</sup>did not search registries; <sup>c</sup>did not describe population in detail; <sup>d</sup>did not justify publication restrictions (years, language)

Supplementary Table 2. Participant and study characteristics grouped by participant diagnosis

| Study Country           | Diagnosis Duration (+/- timing)                       | Participant characteristics (number, age, sex, measure of disease severity)                                  |                                                                                                              | Study characteristics                                                      |            |                   |           |                                                                                             |
|-------------------------|-------------------------------------------------------|--------------------------------------------------------------------------------------------------------------|--------------------------------------------------------------------------------------------------------------|----------------------------------------------------------------------------|------------|-------------------|-----------|---------------------------------------------------------------------------------------------|
|                         |                                                       | Intervention group (s)                                                                                       | Comparator group                                                                                             | Intervention characteristics                                               |            | Outcomes reported |           |                                                                                             |
|                         |                                                       |                                                                                                              |                                                                                                              | Intervention (s)                                                           | Comparator | Critical          | Important |                                                                                             |
| Breathlessness          | HRQoL                                                 | AE                                                                                                           |                                                                                                              |                                                                            |            |                   |           |                                                                                             |
| Agnihotri 2017 India    | Asthma 6 months                                       | n=125<br>37 (11) years<br>54 (44%) female<br>FEV <sub>1</sub> 68 (6) %pred                                   | n=130<br>39 (11) years<br>49 (41%) female<br>FEV <sub>1</sub> 68 (5)%pred                                    | Yoga breathing, 5 sessions per week, 30 min per session                    | Usual care |                   | AQLQ      |                                                                                             |
| Ambrosino 1981 Italy    | COPD 4 weeks                                          | n=23<br>58 (7) years<br>0 (0%) female<br>FEV <sub>1</sub> not reported                                       | n=28<br>56 (9) years<br>0 (0%) female                                                                        | Breathing exercises (DB and PLB) twice daily                               | Usual care |                   |           |                                                                                             |
| Andreasson 2022 Denmark | Asthma 12-week intervention, 6 and 12-month follow-up | n=94<br>median 55 [IQR 44 to 65] years<br>58 (62%) female<br>FEV <sub>1</sub> median 80 [IQR 73 to 87] %pred | n=99<br>median 51 [IQR 42 to 61] years<br>64 (65%) female<br>FEV <sub>1</sub> median 80 [IQR 66 to 90] %pred | Breathing exercises, 2 sessions per day, 10 min per session                | Usual care |                   | Mini-AQLQ | Number of participants with adverse events; serious adverse events; exacerbation; Mortality |
| Baskan 2022 Turkey      | Asthma 4 weeks                                        | n=10<br>mean 34 years, range 23 to 55<br>7 (70%) female<br>FEV <sub>1</sub> not reported                     | n=10<br>mean 34 years, range 23 to 55<br>6 (60%) female                                                      | Breathing exercises (DB and PLB), 1 session per day, 20-30 min per session | Usual care |                   | AQLQ      |                                                                                             |
| Bhatt 2016 India        | Asthma 12 weeks                                       | n=40<br>FEV <sub>1</sub> 1.5 (0.7) litres                                                                    | n=40<br>FEV <sub>1</sub> 1.4 (0.6) litres                                                                    | Yoga breathing                                                             | Usual care |                   |           |                                                                                             |

|                                |                     |                                                                                                                                     |                                                                                               |                                                                        |            |                                                          |                            |                                                                                                             |
|--------------------------------|---------------------|-------------------------------------------------------------------------------------------------------------------------------------|-----------------------------------------------------------------------------------------------|------------------------------------------------------------------------|------------|----------------------------------------------------------|----------------------------|-------------------------------------------------------------------------------------------------------------|
|                                |                     | age range 18 to 72 years; sex not reported                                                                                          |                                                                                               |                                                                        |            |                                                          |                            |                                                                                                             |
| Bidwell 2012<br>United States  | Asthma<br>10 weeks  | n=12<br>43 (4) years<br>12 (100%) female<br>FEV <sub>1</sub> 1.9 (0.8) litres                                                       | n=8<br>40(4) years<br>8 (100%) female<br>FEV <sub>1</sub> 1.8 (0.9) litres                    | Yoga breathing, 2 sessions per week, 60 min per session                | Usual care |                                                          | SGRQ                       |                                                                                                             |
| Bruton 2018a<br>United Kingdom | Asthma<br>12 months | n=261<br>median 56 [IQR 45 to 65] years<br>164 (63%) female<br>FEV <sub>1</sub> 91 (19) %pred                                       | n=132<br>median 57 [IQR 47-65] years<br>164 (63%) female<br>FEV <sub>1</sub> 92 (22) %pred    | Breathing exercises (DVD)                                              | Usual care |                                                          | AQLQ                       | Number of participants with adverse and serious adverse events;<br>Number of participants with exacerbation |
| Bruton 2018b<br>United Kingdom |                     | n=262<br>median 55 [IQR 47-63] years<br>91 (69%) female<br>FEV <sub>1</sub> 89 (18) %pred                                           |                                                                                               | Breathing exercises (face to face)                                     |            |                                                          |                            |                                                                                                             |
| Ceyhan 2022<br>Turkey          | COPD<br>4 weeks     | n=32<br>40-49 years n=1;<br>50-59 years n=6;<br>60-69 years n=18;<br>70+years n=7<br>3 (9%) female<br>FEV <sub>1</sub> not reported | n=35<br>40-49 years n=2; 50-59 years n=8; 60-69 years n=17;<br>70+years n=8<br>4 (11%) female | Breathing exercises (PLB) for 10 min prior to using inhaler medication | Usual care | mMRC scale (data transformed from median to mean values) | SGRQ, COPD assessment test | Number of participants who withdrew from follow-up 'due to other illnesses'                                 |
| Chan 2011*<br>Hong Kong        | COPD<br>12 weeks    | n=69<br>74 (8) years<br>8 (12%) female<br>FEV <sub>1</sub> 0.9 (0.4) litres                                                         | n=37<br>74 (7) years<br>9 (13%) female<br>FEV <sub>1</sub> 0.9 (0.4) litres                   | Breathing exercises (DB and PLB during walking) 1 hour per day         | Usual care |                                                          | SGRQ                       | Number of participants with admission                                                                       |
|                                | COPD                | n=13                                                                                                                                | n=15                                                                                          |                                                                        | Usual care |                                                          |                            |                                                                                                             |

|                                      |                                                             |                                                            |                                                        |                                                                                                                                                                                                                                                   |                                                             |                                                          |                             |                                                   |
|--------------------------------------|-------------------------------------------------------------|------------------------------------------------------------|--------------------------------------------------------|---------------------------------------------------------------------------------------------------------------------------------------------------------------------------------------------------------------------------------------------------|-------------------------------------------------------------|----------------------------------------------------------|-----------------------------|---------------------------------------------------|
| Chauhan<br>1992<br>United<br>Kingdom | 8 weeks                                                     | mean 65 years<br>7 (54%) female                            | mean 69 years<br>6 (40%) female                        | Breathing exercises<br>(balloon inflation) 40<br>times per day                                                                                                                                                                                    |                                                             | Visual<br>analogue<br>scale                              | Visual<br>analogue<br>scale |                                                   |
|                                      |                                                             | FEV <sub>1</sub> not reported                              |                                                        |                                                                                                                                                                                                                                                   |                                                             |                                                          |                             |                                                   |
| Collins<br>2008*<br>United<br>States | COPD<br>36<br>sessions                                      | n=22<br>68 (9) years<br>FEV <sub>1</sub> 41 (18)<br>%pred  | n=20<br>65 (7) years<br>FEV <sub>1</sub> 43 (15) %pred | Breathing retraining with<br>biofeedback AND<br>exercise training^ 3<br>sessions per week<br>(interval training; 18<br>sessions of leg cycle<br>exercise , 18 sessions of<br>treadmill exercise; light<br>upper body strength<br>training)        | Exercise<br>training                                        | CRQ<br>(dyspnoea<br>domain),<br>Borg score<br>at isotime | CRQ                         | Number of<br>participants<br>with<br>exacerbation |
|                                      |                                                             | 97% male                                                   |                                                        |                                                                                                                                                                                                                                                   |                                                             |                                                          |                             |                                                   |
| Collins<br>2014*<br>United<br>States | COPD<br>8-week<br>interventi<br>on, 6-<br>week<br>follow-up | n=35<br>68 (10) years<br>FEV <sub>1</sub> 45 (14)<br>%pred | n=35<br>69 (7) years<br>FEV <sub>1</sub> 41 (13) %pred | Breathing retraining with<br>biofeedback AND<br>exercise training^ with<br>Supplementary oxygen (3<br>sessions per week<br>treadmill; 2 sessions per<br>week upper body<br>resistance training;<br>Supplementary oxygen<br>FiO <sub>2</sub> 0.30) | Exercise<br>training<br>with<br>Suppleme<br>ntary<br>oxygen | CRQ<br>(dyspnoea<br>domain)                              | CRQ                         | Number of<br>participants<br>with<br>exacerbation |
|                                      |                                                             | 95% male                                                   |                                                        |                                                                                                                                                                                                                                                   |                                                             |                                                          |                             |                                                   |
| Collins<br>2019<br>United<br>States  | COPD<br>12 weeks                                            | n=58<br>66 (8) years<br>FEV <sub>1</sub> 44 (15)<br>%pred  | n=61<br>66 (8) years<br>FEV <sub>1</sub> 44 (16) %pred | Breathing retraining with<br>biofeedback AND<br>exercise training^ (3<br>sessions per week<br>treadmill; 2 sessions per<br>week upper body<br>resistance training)                                                                                | Exercise<br>training                                        | CRQ<br>(dyspnoea<br>domain)                              | CRQ                         | Number of<br>participants<br>with<br>exacerbation |
|                                      |                                                             | 95% male                                                   |                                                        |                                                                                                                                                                                                                                                   |                                                             |                                                          |                             |                                                   |

|                                |                                            |                                                                            |                                                                            |                                                                                      |                                                     |                       |            |                                                      |
|--------------------------------|--------------------------------------------|----------------------------------------------------------------------------|----------------------------------------------------------------------------|--------------------------------------------------------------------------------------|-----------------------------------------------------|-----------------------|------------|------------------------------------------------------|
| Cooper 2003*<br>United Kingdom | Asthma 6 months                            | n=30<br>40 (11) years<br>15 (50%) female<br>FEV <sub>1</sub> 77 (16) %pred | n=29<br>47 (11) years<br>11 (34%) female<br>FEV <sub>1</sub> 82 (21) %pred | Buteyko technique, 2 sessions per day                                                | Placebo (adapted Pink City Lung Exerciser device)   |                       | AQLQ, SF36 | Number of exacerbations                              |
| Coulson 2022<br>United States  | Asthma 4 weeks                             | n=45<br>73 (5) years<br>19 (42%) female<br>FEV <sub>1</sub> 77 (19) %pred  | n=45<br>74 (5) years<br>10 (22%) female<br>FEV <sub>1</sub> 80 (3) %pred   | Breathing exercises (DB and PLB with pranayama), 2 sessions per day, <10 min per day | Sham (incentive spirometer, one breath twice daily) |                       | Mini-AQLQ  |                                                      |
| Dekhordi 2021<br>Iran          | COPD 12-week follow-up post admission      | n=40<br>54 (7) years<br>14 (35%) female<br>FEV <sub>1</sub> not reported   | n=40<br>53 (9) years<br>24 (60%) female                                    | Breathing exercises (DB and PLB) 2-3 sessions during admission, 45 min per session   | Usual care                                          |                       |            |                                                      |
| Donesky 2012<br>United States  | COPD 12 weeks                              | n=14<br>72 (7) years<br>10 (71%) female<br>FEV <sub>1</sub> 51 (11) %pred  | n=15<br>68 (12) years<br>11 (73%) female<br>FEV <sub>1</sub> 44 (19) %pred | Yoga breathing, 2 sessions per week                                                  | Usual care                                          | CRQ (dyspnoea domain) | SF36, CRQ  | Number of adverse events related to the intervention |
| Feng 2010a<br>China            | COPD 4 weeks following inpatient admission | n=30<br>62 (10) years<br>12 (40%) female<br>FEV <sub>1</sub> 41 (4) %pred  | n=29<br>62 (11) years<br>11 (40%) female<br>FEV <sub>1</sub> 41 (4) %pred  | Breathing exercises (DB and PLB), 60 min per day                                     | Placebo (not described)                             | mMRC scale            |            |                                                      |
| Feng 2010b<br>China            | admission for exacerbation                 | n=30<br>62 (11) years<br>12 (40%) female<br>FEV <sub>1</sub> 41 (4) %pred  |                                                                            | Breathing exercises (PLB), 60 min per day                                            |                                                     |                       |            |                                                      |
| Feng 2016<br>China             | COPD 8 weeks                               | n=32<br>56 (4) years                                                       | n=32<br>57 (4) years                                                       | Breathing exercises (DB and PLB), twice daily                                        | Usual care                                          | mMRC scale            |            |                                                      |

|                                      |                    |                                                                            |                                                                            |                                                                                                                                      |            |            |           |  |
|--------------------------------------|--------------------|----------------------------------------------------------------------------|----------------------------------------------------------------------------|--------------------------------------------------------------------------------------------------------------------------------------|------------|------------|-----------|--|
|                                      |                    | 8 (25%) female<br>FEV <sub>1</sub> 38 (6) %pred                            | 7 (22%) female<br>FEV <sub>1</sub> 39 (6) %pred                            |                                                                                                                                      |            |            |           |  |
| Fluge<br>1994*<br>Germany            | Asthma 3<br>weeks  | n=12<br>49 (2) years; 22 (61%) female; FEV <sub>1</sub> not reported       | n=12                                                                       | Yoga breathing, 15 sessions                                                                                                          | Usual care |            |           |  |
| Georga<br>2019<br>Greece             | Asthma 8<br>weeks  | n=23<br>49 (13) years<br>16 (70%) female<br>FEV <sub>1</sub> not reported  | n=19<br>49 (13) years<br>14 (74%) female                                   | Breathing retraining with biofeedback, 2 sessions per day                                                                            | Usual care |            | Mini-AQLQ |  |
| Girodo<br>1992*<br>Canada            | Asthma<br>16 weeks | n=46<br>29 (11) years<br>20 (43%) female<br>FEV <sub>1</sub> not reported  | n=23<br>33 (7) years<br>13 (57%) female                                    | Breathing exercises (DB), 3 sessions per week, 60 min per session                                                                    | Usual care |            |           |  |
| Grammato<br>poulou<br>2011<br>Greece | Asthma 6<br>months | n=20<br>48 (15) years<br>7 (35%) female<br>FEV <sub>1</sub> 84 (8) %pred   | n=20<br>45 (13) years<br>10 (50%) female<br>FEV <sub>1</sub> 84 (10) %pred | Breathing exercises (DB);<br>Month 1: 3 sessions per week, 60 min per session;<br>Months 2-6: 2-3 times per day, ≥20 min per session | Usual care | mMRC scale | SF36      |  |
| Gu 2018a<br>China                    | COPD<br>8 weeks    | n=22<br>65 (6) years<br>1 (0.05%) female<br>FEV <sub>1</sub> 36 (13) %pred | n=20<br>68 (8) years<br>1 (0.05%) female<br>FEV <sub>1</sub> 37 (12) %pred | Breathing exercises (breathing manoeuvre#)<br>3 sessions per day, 15 min per session                                                 | Usual care | mMRC scale | SGRQ      |  |
| Gu 2018b<br>China                    |                    | n=23<br>67 (7) years<br>0 (0%) female<br>FEV <sub>1</sub> 38 (13) %pred    |                                                                            | Breathing exercises (DB),<br>3 sessions per day, 15 min per session                                                                  |            |            |           |  |
| Gupta 2015<br>India                  | Asthma<br>12 weeks | n=50<br>Age, sex, FEV <sub>1</sub> not reported                            | n=50                                                                       | Yoga breathing                                                                                                                       | Usual care |            |           |  |



|                                 |                                                   |                                                                                      |                                                                            |                                                                                                                      |                                 |            |                            |                                                      |
|---------------------------------|---------------------------------------------------|--------------------------------------------------------------------------------------|----------------------------------------------------------------------------|----------------------------------------------------------------------------------------------------------------------|---------------------------------|------------|----------------------------|------------------------------------------------------|
| Holloway 2007<br>United Kingdom | Asthma<br>6-month intervention, 6-month follow-up | n=39<br>50 (14) years<br>21 (54%) female<br>FEV <sub>1</sub> 87 (19) %pred           | n=46<br>49 (14) years<br>28 (61%) female<br>FEV <sub>1</sub> 92 (18) %pred | Papworth method, 5 sessions per week, 60 min per session                                                             | Usual care                      |            | SGRQ                       | Number of adverse events                             |
| Kaminsky 2017<br>United States  | COPD<br>12 weeks                                  | n=21<br>68 (7) years<br>14 (67%) female<br>FEV <sub>1</sub> 43 (16) %pred            | n=22<br>68 (9) years<br>12 (55%) female<br>FEV <sub>1</sub> 42 (13) %pred  | Yoga breathing, 30 min per day                                                                                       | Usual care                      | mMRC scale | CAT, SGRQ                  | Number of adverse events related to the intervention |
| Katiyar 2006<br>India           | COPD<br>12 weeks                                  | n=24<br>53 (3) years<br>5 (21%) female<br>FEV <sub>1</sub> 48 (2) %pred              | n=24<br>51 years<br>2 (1%) female<br>FEV <sub>1</sub> 48 (2) %pred         | Yoga breathing, 6 sessions per week, 30 min per session                                                              | Usual care                      |            | SGRQ                       |                                                      |
| Lathadevi 2012<br>India         | Asthma<br>6 weeks                                 | n=24<br>FEV <sub>1</sub> 2.1 (0.5) litres<br>age range 18 to 60 years; 0 (0%) female | n=24<br>FEV <sub>1</sub> 2.2 (0.4) litres                                  | Yoga breathing                                                                                                       | Usual care                      |            |                            |                                                      |
| Laurino 2012<br>Brazil          | Asthma<br>12 weeks                                | n=20<br>45 (12) years<br>17 (85%) female<br>FEV <sub>1</sub> 69 (22) %pred           | n=18<br>42 (12) years<br>15 (83%) female<br>FEV <sub>1</sub> 67 (22) %pred | Breathing retraining with pompage ("manoeuvres performed for muscle fascia"), 1 session per week, 30 min per session | Sham ("subtle touch technique") |            | AQLQ                       | Number of participants with exacerbation             |
| Lausin 2009<br>France           | COPD<br>Single session                            | n=21; mean 68 years; 8 (40%) female; FEV <sub>1</sub> not reported                   |                                                                            | Breathing exercises (DB and PLB), 15 min                                                                             | Same position, nil instruction  |            |                            |                                                      |
| Lee 2022<br>South Korea         | COPD<br>8 weeks                                   | n=8<br>66 (10) years<br>1 (13%) female                                               | n=9<br>71 (6) years<br>1 (11%) female<br>FEV <sub>1</sub> 1.6 (0.4) litres | Breathing exercises (DB and PLB), 5 sessions per week, 20 min per session                                            | Usual care                      | mMRC scale | SGRQ, COPD assessment test | Number of participants with adverse events           |

|                            |                                            |                                                                                 |                                                                          |                                                                                                         |                   |            |                      |                                                                     |
|----------------------------|--------------------------------------------|---------------------------------------------------------------------------------|--------------------------------------------------------------------------|---------------------------------------------------------------------------------------------------------|-------------------|------------|----------------------|---------------------------------------------------------------------|
|                            |                                            | FEV <sub>1</sub> 1.5 (0.5) litres                                               |                                                                          |                                                                                                         |                   |            |                      |                                                                     |
| Lehrer 1997 United States  | Asthma 6 weeks                             | n=6<br>FEV <sub>1</sub> 81 (21) %pred                                           | n=6<br>FEV <sub>1</sub> 68 (28) %pred                                    | Breathing retraining with biofeedback, 6 sessions per week, 30 min per session                          | Sham (relaxation) |            |                      |                                                                     |
|                            |                                            | 38 (13) years; 7 (58%) female                                                   |                                                                          |                                                                                                         |                   |            |                      |                                                                     |
| Lehrer 2004* United States | Asthma 10 weeks                            | n=23<br>39 (12) years<br>17 (74%) female<br>FEV <sub>1</sub> 77 (23) %predicted | n=25<br>39 (15) years<br>8 (70%) female                                  | Breathing retraining with biofeedback, 1 weekly session, home practice 20 min twice daily               | Usual care        |            |                      | Number of participants required oral corticosteroids                |
| Li 2002 China              | COPD 12 weeks                              | n=39<br>FEV <sub>1</sub> 1.6 (0.6) litres                                       | n=35<br>FEV <sub>1</sub> 1.6 (0.7) litres                                | Breathing exercises (DB and PLB) with nutritional supplement, 2 sessions per day, 10-15 min per session | Usual care        |            |                      |                                                                     |
|                            |                                            | Age, sex not reported                                                           |                                                                          |                                                                                                         |                   |            |                      |                                                                     |
| Li 2018 China              | COPD 6 months                              | n=17<br>66 (9) years<br>3 (18%) female<br>FEV <sub>1</sub> 56 (17) %pred        | n=19<br>66 (9) years<br>5 (26%) female<br>FEV <sub>1</sub> 58 (19) %pred | Breathing exercises (Health Qigong Liuzijue), 3 to 4 sessions per week, 60 min per session              | Usual care        |            | SGRQ                 |                                                                     |
| Lin 2012 Taiwan            | COPD 12 weeks                              | n=20<br>68 (12) years<br>5 (25%) female<br>FEV <sub>1</sub> 42 (15) %pred       | n=20<br>69 (9) years<br>2 (10%) female<br>FEV <sub>1</sub> 52 (19) %pred | Breathing exercises (DB and PLB), 2 sessions per day                                                    | Usual care        |            | SGRQ                 | Number of participants with admission                               |
| Lin 2019 Taiwan            | COPD 8-week intervention, 4-week follow-up | n=38<br>71 (8) years<br>4 (5%) female; FEV <sub>1</sub> not reported            | n=40<br>74 (8) years                                                     | Breathing exercises, 5 sessions per week, 30 min per session                                            | Usual care        | mMRC scale | COPD assessment test | Number of participants who discontinued intervention due to illness |

|                                    |                                 |                                                                                              |                                                                                                |                                                                                                        |                              |                                                                                         |      |                                                                 |
|------------------------------------|---------------------------------|----------------------------------------------------------------------------------------------|------------------------------------------------------------------------------------------------|--------------------------------------------------------------------------------------------------------|------------------------------|-----------------------------------------------------------------------------------------|------|-----------------------------------------------------------------|
| Liu 2013<br>China                  | COPD<br>4 months                | n=29<br>69 (3) years<br>8 (28%) female<br>FEV <sub>1</sub> 0.9 (0.1)<br>litres               | n=28<br>69 (1) years<br>5 (18%) female<br>FEV <sub>1</sub> 0.9 (0.1) litres                    | Breathing exercises (DB<br>and PLB, online program)                                                    | Usual care                   |                                                                                         | SGRQ | Number of<br>participants<br>with<br>exacerbation;<br>Mortality |
| Meuret<br>2007<br>United<br>States | Asthma 4<br>weeks               | n=8<br>44 (11) years<br>6 (75%) female<br>FEV <sub>1</sub> 2.3 (0.5)<br>litres               | n=4<br>34 (16) years<br>3 (75%) female<br>FEV <sub>1</sub> 2.2 (0.7) litres                    | Breathing retraining with<br>biofeedback (audio<br>pacing), 5 sessions per<br>week, 60 min per session | Usual care                   |                                                                                         |      |                                                                 |
| Nese 2022*<br>Turkey               | COPD<br>10 weeks                | n=40<br>65 (8) years<br>9 (11%) female<br>FEV <sub>1</sub> not reported                      | n=40<br>67 (7) years                                                                           | Breathing exercises (DB),<br>3 sessions per day, 10<br>min per session                                 | Usual care                   | Dyspnea-12<br>Scale                                                                     |      | Mortality                                                       |
| Nield<br>2007*<br>United<br>States | COPD<br>4 weeks                 | n=14<br>62 (12) years<br>1 (7%) female<br>FEV <sub>1</sub> 35 (8) %pred                      | n=13<br>69 (8) years<br>1 (8%) female<br>FEV <sub>1</sub> 40 (15) %pred                        | Breathing exercises (PLB),<br>1 session per day, 10-25<br>min per session                              | Usual care                   | University<br>of<br>California,<br>San Diego<br>Shortness<br>of Breath<br>Questionnaire | SF36 |                                                                 |
| Opat 2000<br>Australia             | Asthma 4<br>weeks               | n=18<br>32 (10) years<br>9 (50%) female<br>severity mild n=7;<br>moderate n=8;<br>severe n=1 | n=18<br>33 (11) years<br>12 (67%) female<br>severity mild n=11;<br>moderate n=5;<br>severe n=1 | Buteyko technique<br>(video), 2 sessions per<br>day, 20 min per session                                | Placebo<br>(nature<br>video) |                                                                                         | AQLQ | Number of<br>participants<br>with<br>exacerbation               |
| Ozer 2021<br>Turkey                | Mixed<br>COPD/asthma<br>8 weeks | n=30<br>18-25 years n=3;<br>26-35 years n=5;<br>36-45 years n=11;<br>46-55 years n=11        | n=30<br>18-25 years n=0; 26-<br>35 years n=6; 36-45<br>years n=15; 46-55<br>years n=19         | Yoga breathing (Zoom), 2<br>sessions per week, 60-90<br>min per session                                | Usual care                   | mMRC<br>scale                                                                           |      |                                                                 |

|                            |                                                        |                                                                                                                    |                                                                                          |                                                                                                                                                                                                |                       |  |      |                                     |
|----------------------------|--------------------------------------------------------|--------------------------------------------------------------------------------------------------------------------|------------------------------------------------------------------------------------------|------------------------------------------------------------------------------------------------------------------------------------------------------------------------------------------------|-----------------------|--|------|-------------------------------------|
|                            |                                                        | 20 (67%) female<br>FEV <sub>1</sub> 75 (13)<br>%pred<br>asthma n=12<br>(40%)<br>COPD n=18 (60%)                    | 26 (87%) female<br>FEV <sub>1</sub> 73 (9) %pred<br>asthma n=15 (50%)<br>COPD n=15 (50%) |                                                                                                                                                                                                |                       |  |      |                                     |
| Peng 2022<br>China         | COPD<br>4-week<br>intervention,<br>8-week<br>follow-up | n=50<br>59 (5) years<br>22 (44%) female<br>FEV <sub>1</sub> not reported                                           | n=50<br>59 (5) years<br>20 (40%) female                                                  | Breathing exercises (DB),<br>2 sessions per day, 15<br>min per session AND<br>inhalation therapy<br>(tiotropium bromide<br>powder 18 µg once daily,<br>N-acetylcysteine 600 mg<br>twice daily) | Inhalation<br>therapy |  |      | Number of<br>'adverse<br>reactions' |
| Pourdowlat<br>2019<br>Iran | Asthma 6<br>weeks                                      | n=30<br>20-30 years n=6;<br>30-40 years n=6;<br>40-45 years n=3<br>9 (60%) female<br>FEV <sub>1</sub> not reported | n=30<br>20-30 years n=6; 30-<br>40 years n=6; 40-45<br>years n=3<br>11 (73%) female      | Papworth method<br>training 1 session per<br>week, 120 min per<br>session                                                                                                                      | Usual care            |  | SF36 |                                     |
| Prasanna<br>2015<br>India  | Asthma 8<br>weeks                                      | 40 (9) years<br>64% female<br>n=100; FEV <sub>1</sub> not reported                                                 | 37 (8) years<br>60% female                                                               | Buteyko technique, 2<br>sessions per day                                                                                                                                                       | Usual care            |  |      |                                     |
| Prem<br>2013a<br>India     | Asthma<br>12 weeks                                     | n=39<br>38 (13) years<br>23 (59%) female<br>FEV <sub>1</sub> 2.3 (0.8)<br>litres                                   | n=40<br>41 (14) years<br>26 (65%) female<br>FEV <sub>1</sub> 2.0 (0.6) litres            | Buteyko technique, 2<br>sessions per day, 15 min<br>per session                                                                                                                                | Usual care            |  | AQLQ | Number of<br>exacerbations          |
| Prem<br>2013b<br>India     |                                                        | n=36<br>35 (13) years<br>19 (53%) female<br>FEV <sub>1</sub> 2.3 (0.8)<br>litres                                   |                                                                                          | Yoga breathing, 2<br>sessions per day, 15 min<br>per session                                                                                                                                   |                       |  |      |                                     |

|                                       |                           |                                                                                               |                                                                                            |                                                                                                                                             |                          |               |                             |                                                                |
|---------------------------------------|---------------------------|-----------------------------------------------------------------------------------------------|--------------------------------------------------------------------------------------------|---------------------------------------------------------------------------------------------------------------------------------------------|--------------------------|---------------|-----------------------------|----------------------------------------------------------------|
| Pushpa<br>2018<br>India               | Asthma 8<br>weeks         | n=30<br>33 (9) years<br>20 (67%) female<br>FEV <sub>1</sub> 2.1 (0.6)<br>litres               | n=30<br>33 (9) years<br>20 (67%) female<br>FEV <sub>1</sub> 2.1 (0.6) litres               | Yoga breathing, 2<br>sessions per day, 45 min<br>per session                                                                                | Usual care               |               |                             |                                                                |
| Ranjita<br>2016<br>India              | COPD<br>12 weeks          | n=36<br>54 (6) years<br>0 (0%) female<br>FEV <sub>1</sub> not reported                        | n=36<br>54 (5) years<br>0 (0%) female                                                      | Yoga breathing, 6<br>sessions per week, 90<br>min per session                                                                               | Usual care               | mMRC<br>scale | COPD<br>assessme<br>nt test | Number of<br>participants<br>with 'illness'                    |
| Sabina<br>2005<br>United<br>States    | Asthma<br>16 weeks        | n=29<br>52.3 [SE 2.59]<br>years<br>24 (83%) female<br>FEV <sub>1</sub> 2.1 [SE 0.1]<br>litres | n=33<br>49.9 [SE 2.48] years<br>22 (67%) female<br>FEV <sub>1</sub> 2.7 [SE 0.2]<br>litres | Yoga breathing, 4 weeks<br>of 2 sessions per week,<br>90 min per session; then<br>12 weeks of 3 sessions<br>per week, 20 min per<br>session | Sham<br>(stretchin<br>g) |               | Mini-<br>AQLQ               | Adverse<br>events<br>related to the<br>intervention            |
| Sakhaei<br>2018<br>Iran               | COPD<br>Single<br>session | n=20<br>61 (13) years<br>11 (55%) female<br>FEV <sub>1</sub> not reported                     | n=20<br>62 (13) years<br>5 (25%) female                                                    | Breathing exercises (DB<br>and PLB)                                                                                                         | Usual care               |               |                             |                                                                |
| Sangeethal<br>axmi 2022<br>India      | Asthma<br>90 days         | n=30<br>24 (3) years<br>FEV <sub>1</sub> 0.9 (0.2)<br>litres<br>sex not reported              | n=30<br>23 (3) years<br>FEV <sub>1</sub> 0.9 (0.2) litres                                  | Yoga breathing, 1 session<br>per day                                                                                                        | Usual care               |               | AQLQ                        |                                                                |
| Satpathy<br>2016<br>India             | Asthma<br>4 months        | n=37<br>25 (2) years<br>0 (0%) female; FEV <sub>1</sub> not reported                          | n=34<br>25 (3) years                                                                       | Yoga breathing, 1 session<br>per day                                                                                                        | Usual care               | mMRC<br>scale |                             | Number of<br>participants<br>with<br>exacerbation              |
| Saunders<br>1965<br>United<br>Kingdom | COPD<br>12 weeks          | n=100; Age, sex not reported<br>FEV <sub>1</sub> 1.3 (0.7)<br>litres                          | FEV <sub>1</sub> 1.2 (0.6) litres                                                          | Breathing exercises                                                                                                                         | Usual care               |               |                             | Number of<br>participants<br>with chest<br>cold<br>("increased |

|                          |                     |                                                                                                      |                                                                                  |                                                                               |                                                                      |  |               |                                                                 |
|--------------------------|---------------------|------------------------------------------------------------------------------------------------------|----------------------------------------------------------------------------------|-------------------------------------------------------------------------------|----------------------------------------------------------------------|--|---------------|-----------------------------------------------------------------|
|                          |                     |                                                                                                      |                                                                                  |                                                                               |                                                                      |  |               | cough and phlegm for three weeks or more")                      |
| Shen 2021<br>China       | ILD<br>12<br>months | n=39<br>65 (6) years<br>2 (5%) female<br>DLCO 67 (20) %                                              | n=43<br>65 (8) years<br>3 (7%) female<br>DLCO 59 (22) %                          | Breathing exercises<br>("deep breathing in 3<br>movements"), 9 min per<br>day | Usual care                                                           |  | SGRQ          | Number of<br>participants<br>with<br>exacerbation;<br>Mortality |
| Singh 2012<br>India      | Asthma<br>8 weeks   | n=15<br>FEV <sub>1</sub> 2.8 (0.6)<br>litres<br>age, sex not reported                                | n=15<br>FEV <sub>1</sub> 2.8 (0.7) litres                                        | Yoga breathing, 1 session<br>per day, 40-50 min per<br>session                | Usual care                                                           |  | AQLQ          |                                                                 |
| Slader 2006<br>Australia | Asthma<br>28 weeks  | n=28<br>17 (61%) female<br>FEV <sub>1</sub> mean 81<br>(95%CI 75 to 87)<br>%pred<br>Age not reported | n=29<br>15 (52%) female<br>FEV <sub>1</sub> mean 79<br>(95%CI 72 to 85)<br>%pred | Breathing exercises, 2<br>sessions per day, 26 min<br>per session             | Sham<br>(non-<br>specific<br>upper<br>body<br>mobility<br>exercises) |  | AQLQ,<br>ACQ7 | Number of<br>participants<br>with<br>exacerbation               |
| Sodhi 2014<br>India      | Asthma<br>8 weeks   | n=60<br>39 (10) years<br>26 (43%) female<br>FEV <sub>1</sub> not reported                            | n=60<br>36 (11) years<br>23 (33%) female                                         | Yoga breathing, 2<br>sessions per day, 45 min<br>per session                  | Usual care                                                           |  | AQLQ          | 'Number of<br>attacks per<br>week'                              |
| Soni 2012<br>India       | COPD<br>8 weeks     | n=30<br>FEV <sub>1</sub> 1.5 (0.5)<br>litres<br>Age, sex not reported                                | n=30<br>FEV <sub>1</sub> 1.2 (0.3) litres                                        | Yoga breathing, 1 session<br>per day, 40-50 min per<br>session                | Usual care                                                           |  |               |                                                                 |
| Sun 2003<br>China        | COPD<br>6 months    | n=45<br>FEV <sub>1</sub> 1.5 (0.6)<br>litres<br>69 (8) years; 42 (47%) female                        | n=45<br>FEV <sub>1</sub> 1.4 (0.6) litres                                        | Breathing exercises, 3<br>sessions per day, 10 min<br>per session             | Usual care                                                           |  |               |                                                                 |

|                                       |                    |                                                                                |                                                                             |                                                                                                                                                                                                                                                                        |                      |                             |      |  |
|---------------------------------------|--------------------|--------------------------------------------------------------------------------|-----------------------------------------------------------------------------|------------------------------------------------------------------------------------------------------------------------------------------------------------------------------------------------------------------------------------------------------------------------|----------------------|-----------------------------|------|--|
| Tang 2016<br>China                    | COPD<br>8 weeks    | n=20<br>73 (4) years<br>8 (40%) female<br>FEV <sub>1</sub> 1.0 (0.4)<br>litres | n=20<br>72 (4) years<br>8 (40%) female<br>FEV <sub>1</sub> 0.9 (0.4) litres | Breathing exercises<br>(breathing manoeuvre#),<br>3 sessions per day, 15<br>min per session                                                                                                                                                                            | Usual care           | mMRC<br>scale               | SGRQ |  |
| Turan 2020<br>Turkey                  | Asthma 6<br>weeks  | n=56<br>37 (10) years<br>49 (88%) female<br>FEV <sub>1</sub> 93 (19)<br>%pred  | n=56<br>40 (9) years<br>45 (80%) female<br>FEV <sub>1</sub> 86 (18) %pred   | Yoga breathing, 2<br>sessions per week, 60-90<br>min per session                                                                                                                                                                                                       | Usual care           |                             | AQLQ |  |
| Van Gestel<br>2012<br>Germany         | COPD<br>4 weeks    | n=20<br>66 (6) years<br>11 (55%) female<br>FEV <sub>1</sub> 47 (20)<br>%pred   | n=20<br>66 (7) years<br>12 (60%) female<br>FEV <sub>1</sub> 47 (17) %pred   | Breathing retraining with<br>biofeedback (10 sessions,<br>30 min per session) AND<br>Exercise training (10<br>supervised sessions, 3<br>sessions per week, 90<br>min per session; strength<br>training, cycle ergometer<br>started at 30% peak<br>workload for 20 min) | Exercise<br>training | CRQ<br>(dyspnoea<br>domain) | CRQ  |  |
| Vedanthan<br>1998<br>United<br>States | Asthma<br>16 weeks | n=9<br>mean 28 years<br>3 (33%) female<br>FEV <sub>1</sub> mean 3.2<br>litres  | n=8<br>mean 25 years<br>6 (75%) female<br>FEV <sub>1</sub> mean 4 litres    | Yoga breathing, 3<br>sessions per week, 45<br>min per session                                                                                                                                                                                                          | Usual care           |                             |      |  |
| Vempati<br>2009<br>India              | Asthma 8<br>weeks  | n=29<br>34 (11) years<br>6 (21%) female<br>FEV <sub>1</sub> 70 (17)<br>%pred   | n=29<br>33 (12) years<br>8 (28%) female<br>FEV <sub>1</sub> 63 (19) %pred   | Yoga breathing, 5<br>sessions per week, 90<br>min per session                                                                                                                                                                                                          | Usual care           |                             | AQLQ |  |
| Wu 2006<br>China                      | COPD<br>12 weeks   | n=20<br>70 (6) years<br>0 (0%) female                                          | n=10<br>70 (7) years<br>0 (0%) female                                       | Breathing exercises (DB<br>and PLB)                                                                                                                                                                                                                                    | Usual care           |                             |      |  |

|                             |                                     |                                                                                                             |                                                                                                            |                                                                                    |                                              |            |      |                                                                               |
|-----------------------------|-------------------------------------|-------------------------------------------------------------------------------------------------------------|------------------------------------------------------------------------------------------------------------|------------------------------------------------------------------------------------|----------------------------------------------|------------|------|-------------------------------------------------------------------------------|
|                             |                                     | FEV <sub>1</sub> 30 (11) %pred                                                                              | FEV <sub>1</sub> 32 (12) %pred                                                                             |                                                                                    |                                              |            |      |                                                                               |
| Yamaguti 2012<br>Brazil     | COPD<br>4 weeks                     | n=15<br>mean 67 (95%CI 54 to 78) years<br>4 (27%) female<br>FEV <sub>1</sub> mean 43 (95%CI 24 to 63) %pred | n=15<br>mean 66 (95%CI 54 to 78) years<br>4 (27%) female<br>FEV <sub>1</sub> mean 42 (95%CI 18 to 7) %pred | Breathing exercises, 3 sessions per week, 45 min per session                       | Usual care                                   | mMRC scale | SGRQ | Number of protocol violations due to 'exacerbations or other health problems' |
| Yan 1996<br>China           | COPD<br>1-20 months                 | n=165<br>62 (11) years<br>44 (27%) female<br>FEV <sub>1</sub> not reported                                  | n=159<br>61 (11) years<br>55 (35%) female                                                                  | Breathing exercises (DB and PLB), 2-4 sessions per day, 15-30 min per session      | Placebo ("healthy lung capsule" twice daily) |            |      |                                                                               |
| Yekefallah 2019<br>Iran     | COPD<br>4 weeks                     | n=25<br>6 (24%) female<br>Age, FEV <sub>1</sub> not reported                                                | n=25<br>64 (13) years<br>7 (28%) female<br>FEV <sub>1</sub> not reported                                   | Breathing exercises (DB and PLB), 4 sessions per day, 20 min per session           | Usual care                                   |            |      |                                                                               |
| Yuce 2020<br>Turkey         | Asthma 4 weeks                      | n=25<br>42 (15) years<br>22 (88%) female<br>FEV <sub>1</sub> 2.7 (0.7) litres                               | n=25<br>46 (13) years<br>23 (92%) female<br>FEV <sub>1</sub> 2.3 (0.8) litres                              | Yoga breathing, 1 session per day, 20 min per session                              | Sham (progressive relaxation training)       |            | AQLQ |                                                                               |
| Zakerimoghadam 2011<br>Iran | COPD<br>10 days                     | n=60; "majority of subjects were aging over 70"; 18 (30%) female; FEV <sub>1</sub> not reported             |                                                                                                            | Breathing exercises, 4 sessions per day                                            | Usual care                                   |            |      |                                                                               |
| Zhang 2008a<br>China        | COPD<br>8 weeks following inpatient | n=20<br>69 (4) years<br>3 (15%) female<br>FEV <sub>1</sub> not reported                                     | n=20<br>70 (2) years<br>2 (10%) female                                                                     | Breathing exercises (breathing manoeuvre#), 3 sessions per day, 15 min per session | Usual care                                   | mMRC scale |      |                                                                               |



|                      |                            |                                                                                                          |                                                             |                                                                      |  |  |  |  |
|----------------------|----------------------------|----------------------------------------------------------------------------------------------------------|-------------------------------------------------------------|----------------------------------------------------------------------|--|--|--|--|
|                      | admission for exacerbation | GOLD III n=12;<br>GOLD IV n=8                                                                            | FEV <sub>1</sub> not reported<br>GOLD III n=13; GOLD IV n=7 |                                                                      |  |  |  |  |
| Zhang 2008b<br>China |                            | n=20<br>70 (4) years<br>4 (20%) female<br>FEV <sub>1</sub> not reported<br>GOLD III n=13;<br>GOLD IV n=7 |                                                             | Breathing exercises (PLB),<br>3 sessions per day, 15 min per session |  |  |  |  |

Data are mean (SD) unless indicated. Participants are clinically stable outpatients unless indicated. ACQ, Asthma Control Questionnaire; AQLQ, Asthma Quality of Life Questionnaire; COPD, chronic obstructive pulmonary disease; CRQ, Chronic Respiratory Disease Questionnaire; DB, diaphragmatic breathing; FEV<sub>1</sub>, forced expiratory volume in 1 second; FVC, forced vital capacity; ILD, interstitial lung disease; mMRC, modified Medical Research Council scale; PLB, pursed lip breathing; SGRQ, St George's respiratory questionnaire; SF36, 36-Item Short Form Health Survey. \*not all intervention groups/study phases relevant to this review. ^ exercise training: commenced at 60% of VO<sub>2</sub>peak, increased to 85%; training duration commenced at 25 min, increased to 45 min. # breathing manoeuvre: quick inspiration to total lung capacity (0.8 to 1.0 seconds), slow expiration (3 to 4 seconds).

Supplementary Table 3. Study inclusion and exclusion criteria

| Study          | Inclusion and exclusion criteria                                                                                                                                                                                                                                                                                                                                                                                                                                                                                                                                                                                                                                                                                                                                                                                                                                                  |
|----------------|-----------------------------------------------------------------------------------------------------------------------------------------------------------------------------------------------------------------------------------------------------------------------------------------------------------------------------------------------------------------------------------------------------------------------------------------------------------------------------------------------------------------------------------------------------------------------------------------------------------------------------------------------------------------------------------------------------------------------------------------------------------------------------------------------------------------------------------------------------------------------------------|
| COPD           |                                                                                                                                                                                                                                                                                                                                                                                                                                                                                                                                                                                                                                                                                                                                                                                                                                                                                   |
| Ambrosino 1981 | INCLUSION male, “recently discovered COPD... not been submitted to any prior therapy”, mild degree chronic airway obstruction<br>EXCLUSION bronchial asthma, tuberculosis or other relevant diseases, cor pulmonale                                                                                                                                                                                                                                                                                                                                                                                                                                                                                                                                                                                                                                                               |
| Ceyhan 2022    | INCLUSION age $\geq 18$ years, diagnosed $\geq 3$ months, inhalers $\geq$ twice daily, no previous breathing exercise training or rehabilitation program<br>EXCLUSION mental disorders, communication disabilities, heart disease that could lead to dyspnoea, unstable angina                                                                                                                                                                                                                                                                                                                                                                                                                                                                                                                                                                                                    |
| Chan 2011      | INCLUSION independently ambulant<br>EXCLUSION severe sensory or cognitive impairment, symptomatic ischaemic heart disease, participation in Tai Chi Qigong within 1 year                                                                                                                                                                                                                                                                                                                                                                                                                                                                                                                                                                                                                                                                                                          |
| Chauhan 1992   | INCLUSION severe disease ( $FEV_1 < 1$ litre $\geq 3$ separate clinic assessments)<br>EXCLUSION not reported                                                                                                                                                                                                                                                                                                                                                                                                                                                                                                                                                                                                                                                                                                                                                                      |
| Collins 2008   | INCLUSION age $\geq 40$ years, $PaO_2 \geq 56$ mmHg at rest, mean $SpO_2 \geq 85\%$ at peak exercise (+/- supplemental oxygen), stable clinical condition without an exacerbation during preceding 6 weeks, MMSE score $> 23$<br>EXCLUSION significant cardiovascular, neuromuscular or orthopaedic impairments that could interfere with exercise testing                                                                                                                                                                                                                                                                                                                                                                                                                                                                                                                        |
| Collins 2014   | INCLUSION age $> 40$ years of age, stable clinical condition without exacerbation $\geq 4$ weeks, ability to walk on a treadmill<br>EXCLUSION primary asthma, congestive heart failure New York Heart Association Class III-IV, cardiovascular, neuromuscular or orthopedic impairments that could interfere with exercise testing, participated in a formal exercise program within previous 12 weeks                                                                                                                                                                                                                                                                                                                                                                                                                                                                            |
| Collins 2019   | INCLUSION age $\geq 40$ years, $SpO_2 \geq 90\%$ at peak exercise (+/- supplemental oxygen), stable clinical condition, able to hear metronome sounds, lives near Hines, IL (Chicagoland area)<br>EXCLUSION respiratory infection/exacerbation within 4 weeks, exercise limiting heart disease (+ stress test or other indicators of heart disease or complaints of angina during the stress test), primary asthma, Congestive heart failure (New York Heart Association Class III or IV), exercise-limiting peripheral arterial disease (stops exercise due to intermittent claudication), stops exercise due to arthritic pain in the knee or hips (self-report), inability to walk on the treadmill, pregnancy, any unforeseen illness or disability that would preclude exercise testing or training, participation in a formal exercise program within the previous 12 weeks |
| Dekhordi 2021  | INCLUSION age 15 to 70 years, inpatient, lack of cognitive impairment, stability of physical conditions, ability to attend training sessions, absence of serious disease (including malignancy, diabetes, immunocompromised condition and stroke)<br>EXCLUSION exacerbation [during the study]                                                                                                                                                                                                                                                                                                                                                                                                                                                                                                                                                                                    |
| Donesky 2012   | INCLUSION age $\geq 40$ years, stable clinical condition, dyspnoea symptoms in daily life, if receiving Supplementary oxygen: $SpO_2 \geq 80\%$ on $\leq 6L/min$ during 6MWT                                                                                                                                                                                                                                                                                                                                                                                                                                                                                                                                                                                                                                                                                                      |

|               |                                                                                                                                                                                                                                                                                                                                                                                                                                                                                                                                                                           |
|---------------|---------------------------------------------------------------------------------------------------------------------------------------------------------------------------------------------------------------------------------------------------------------------------------------------------------------------------------------------------------------------------------------------------------------------------------------------------------------------------------------------------------------------------------------------------------------------------|
|               | EXCLUSION active symptomatic illness, participation in pulmonary rehabilitation, yoga, or exercise training within 6 months                                                                                                                                                                                                                                                                                                                                                                                                                                               |
| Feng 2010     | INCLUSION inpatient admission for exacerbation<br>EXCLUSION other cardiorespiratory disease, pleural diseases or thoracic deformity                                                                                                                                                                                                                                                                                                                                                                                                                                       |
| Feng 2016     | INCLUSION severe to very severe disease, stable clinical condition over previous 4 weeks (no exacerbation, no oral or inhaled steroid)<br>EXCLUSION not reported                                                                                                                                                                                                                                                                                                                                                                                                          |
| Gu 2018       | INCLUSION age $\geq 50$ years, moderate or severe disease, stable clinical condition over previous 4 weeks (no exacerbation, no dyspnoea symptoms in daily life), no diagnosis of bronchial asthma<br>EXCLUSION complicated with respiratory failure, disorders involving pleural cavity, thoracic wall, bone and joint, or neurological or muscular system, history or previously diagnosed with major disorders including cardiac, hepatic, or renal disorders or tumours, psychological or cognitive abnormalities, previous participation in pulmonary rehabilitation |
| Kaminsky 2017 | INCLUSION age $\geq 18$ years, stable clinical condition over previous 4 weeks, mMRC scale score $>2$ , not enrolled in pulmonary rehabilitation or practicing yoga, non-smoker<br>EXCLUSION not reported                                                                                                                                                                                                                                                                                                                                                                 |
| Katiyar 2006  | INCLUSION severe, stable clinical condition<br>EXCLUSION age $<40$ years, history or spirometric evidence of asthma, requirement for Supplementary oxygen, recent hospitalisation, $\text{PaCO}_2 > 50\text{mmHg}$ , cardiac disease, cor pulmonale, abnormal liver, renal or haematological profile, poor compliance                                                                                                                                                                                                                                                     |
| Lausin 2009   | INCLUSION $\text{FEV}_1$ between 30% and 80% predicted; 5 days free of acute exacerbation<br>EXCLUSION not reported                                                                                                                                                                                                                                                                                                                                                                                                                                                       |
| Lee 2022      | INCLUSION age 40 to 80 years, mMRC scale score $\geq 2$<br>EXCLUSION serious respiratory illness other than COPD, acute deterioration within 2 weeks, change in $\text{FEV}_1$ or FVC of 12% and 200 mL, other illnesses that may cause death or disability during 1-year period, difficulty walking, unstable cardiovascular disease, severe untreated pulmonary hypertension, alcoholics or those with a history of substance abuse, medication from another clinical trial within 30 days, current smoker, pregnant, breastfeeding                                     |
| Li 2002       | INCLUSION not reported<br>EXCLUSION not reported                                                                                                                                                                                                                                                                                                                                                                                                                                                                                                                          |
| Li 2018       | INCLUSION age 40 to 80 years, stable clinical condition over previous 4 weeks, no regular exercise program for $\geq 6$ months<br>EXCLUSION acute exacerbation of COPD, bronchiectasis, bronchial asthma, bronchial tumour, tuberculosis or cancer, severe cardiovascular, cerebrovascular, liver, kidney, or hematopoietic system disease, mental disorder, extremely weak or physical disability, pregnant, breastfeeding                                                                                                                                               |
| Lin 2012      | INCLUSION no previous respiratory training<br>EXCLUSION acute asthma exacerbation, other respiratory disease under active treatment, heart failure, pregnant                                                                                                                                                                                                                                                                                                                                                                                                              |
| Lin 2019      | INCLUSION age $\geq 40$ years                                                                                                                                                                                                                                                                                                                                                                                                                                                                                                                                             |

|               |                                                                                                                                                                                                                                                                                                                                                                                                                                                                                          |
|---------------|------------------------------------------------------------------------------------------------------------------------------------------------------------------------------------------------------------------------------------------------------------------------------------------------------------------------------------------------------------------------------------------------------------------------------------------------------------------------------------------|
|               | EXCLUSION long-term oxygen therapy, visited emergency room or were hospitalized within previous month, atrial fibrillation, severe cognitive impairment, >class II heart failure as defined by the New York Heart Association (NYHA) functional classification in previous 6 months, pacemaker, cancer treatment, participation in other exercise trial                                                                                                                                  |
| Liu 2013      | INCLUSION stable clinical condition (no oral glucocorticoid treatment within 3 months), no history of bronchial asthma, test for bronchiectasis was negative, computer with Internet access was available in the home, "All subjects were familiar with logging onto the Internet, navigating their way to a website, and using a computer mouse, and were able to watch an instruction video and graph on the computer screen and listen to an instructional audio with relaxing music" |
|               | EXCLUSION malignancy, cardiac failure, distal arteriopathy, severe endocrine, hepatic or renal disease                                                                                                                                                                                                                                                                                                                                                                                   |
| Nese 2022     | INCLUSION age $\geq 18$ years, diagnosed for $\geq 6$ months                                                                                                                                                                                                                                                                                                                                                                                                                             |
|               | EXCLUSION physical and mental health illness, hearing problems, heart failure or anaemia                                                                                                                                                                                                                                                                                                                                                                                                 |
| Nield 2007    | INCLUSION no exacerbation in last 4 weeks, dyspnoea during walking, modified Borg score $\geq 3$ on 6MWT                                                                                                                                                                                                                                                                                                                                                                                 |
|               | EXCLUSION not reported                                                                                                                                                                                                                                                                                                                                                                                                                                                                   |
| Peng 2021     | INCLUSION age $\geq 18$ years no other organic diseases, no record of adverse effect from drugs, substance abuse or history of smoking and alcoholism                                                                                                                                                                                                                                                                                                                                    |
|               | EXCLUSION lung cancer, asthma and bronchiectasis, mental disorders, family history of hereditary diseases                                                                                                                                                                                                                                                                                                                                                                                |
| Ranjita 2016  | INCLUSION age 36 to 60 years, male, stable clinical condition $\geq 3$ months, moderate to severe, coal miners, able to walk without aid, non-smoker                                                                                                                                                                                                                                                                                                                                     |
|               | EXCLUSION recent COPD exacerbation, respiratory tract infection within previous month, unstable angina, myocardial infarction, angioplasty, heart surgery in the previous 3 months, basal blood pressure $>180/100$ mmHg, resting PR $>120$ bpm, BMI $>35$ kg/m <sup>2</sup> , injury-free, no history of hospitalization, neuromuscular conditions interfering with exercise tests, previous participation in yoga program, ex-smoker                                                   |
| Saunders 1965 | INCLUSION diagnosis of chronic bronchitis (persistent cough, sputum on most days for $>3$ months, short of breath)                                                                                                                                                                                                                                                                                                                                                                       |
|               | EXCLUSION not reported                                                                                                                                                                                                                                                                                                                                                                                                                                                                   |
| Soni 2012     | INCLUSION mild and moderate disease severity                                                                                                                                                                                                                                                                                                                                                                                                                                             |
|               | EXCLUSION history of exacerbation or respiratory tract infections, tuberculosis, diabetes or any other disorder, current smoker, pregnant, breastfeeding                                                                                                                                                                                                                                                                                                                                 |
| Sun 2003      | INCLUSION age $\geq 60$ years, GOLD severity II and III, stable clinical condition over previous 4 weeks                                                                                                                                                                                                                                                                                                                                                                                 |
|               | EXCLUSION bronchial asthma, bronchiectasis, ischaemic heart disease, diabetes, hypertension                                                                                                                                                                                                                                                                                                                                                                                              |
| Tang 2016     | INCLUSION age $>40$ years, severe and extremely severe GOLD severity C-D, stable clinical condition over previous 4 weeks (no exacerbation, no oral or inhaled steroid), negative bronchodilation test                                                                                                                                                                                                                                                                                   |
|               | EXCLUSION not reported                                                                                                                                                                                                                                                                                                                                                                                                                                                                   |

|                     |                                                                                                                                                                                                                                                                                                                                                                                                                                    |
|---------------------|------------------------------------------------------------------------------------------------------------------------------------------------------------------------------------------------------------------------------------------------------------------------------------------------------------------------------------------------------------------------------------------------------------------------------------|
| Van Gestel 2012     | INCLUSION age 40 to 75 years, stable clinical condition (no changes in medication dosage or frequency of administration, no clinical signs or symptoms of acute exacerbations and no hospital admissions in the preceding 6 weeks), BMI >18 and <25kg/m <sup>2</sup> .                                                                                                                                                             |
|                     | EXCLUSION oxygen desaturation to <80% during exercise on room air, respiratory disorders other than COPD, history of significant inflammatory disease other than COPD, cardiac diseases such as heart failure, cardiac arrhythmia and/or coronary artery disease, primary pulmonary vascular disease, history of lung surgery, diagnosis of cancer, unable to walk, oral corticosteroids and/or vasoactive medication at inclusion |
| Wu 2006             | INCLUSION stable clinical condition                                                                                                                                                                                                                                                                                                                                                                                                |
|                     | EXCLUSION not reported                                                                                                                                                                                                                                                                                                                                                                                                             |
| Yamaguti 2012       | INCLUSION age 30 to 90 years, post-bronchodilator FEV <sub>1</sub> <80% predicted value, stable condition without changes in medication and symptoms (dyspnea, volume or color of sputum) ≥4 weeks, regular treatment with inhaled bronchodilators and steroids                                                                                                                                                                    |
|                     | EXCLUSION other pulmonary, cardiovascular or musculoskeletal diseases, participation in exercise training program within 2 years, current smoker                                                                                                                                                                                                                                                                                   |
| Yan 1996            | INCLUSION stable clinical condition                                                                                                                                                                                                                                                                                                                                                                                                |
|                     | EXCLUSION disease affected by right heart                                                                                                                                                                                                                                                                                                                                                                                          |
| Yekefallah 2019     | INCLUSION severe to moderate disease severity, stable clinical condition                                                                                                                                                                                                                                                                                                                                                           |
|                     | EXCLUSION symptom exacerbation, serious cardiopulmonary or neuromuscular problems which interfered with performing exercise                                                                                                                                                                                                                                                                                                        |
| Zakerimoghadam 2011 | INCLUSION mild or moderate disease severity, did not have other chronic diseases, had not recognized psychotic confusion, did not consume drug in this instance                                                                                                                                                                                                                                                                    |
|                     | EXCLUSION not reported                                                                                                                                                                                                                                                                                                                                                                                                             |
| Zhang 2008          | INCLUSION age ≥40 years, GOLD stage III or IV, 4 weeks post exacerbation, negative bronchodilation test, no oral or inhaled steroid                                                                                                                                                                                                                                                                                                |
|                     | EXCLUSION severe arrhythmia, chronic heart failure, ischaemic heart disease, severe impaired organ function or tumour, history of mental illness, drug abused, allergy to medication                                                                                                                                                                                                                                               |
| Asthma              |                                                                                                                                                                                                                                                                                                                                                                                                                                    |
| Agnihotri 2017      | INCLUSION age 12 to 60 years, mild to moderate disease severity, non-smoker or ex-smoker (<10 pack/year, ≥6 months)                                                                                                                                                                                                                                                                                                                |
|                     | EXCLUSION Severe airflow limitation (FEV <sub>1</sub> <60%), associated chronic respiratory diseases, major psychiatric illness, pregnant, breastfeeding                                                                                                                                                                                                                                                                           |
| Andreasson 2022     | INCLUSION ≥2 consultations following referral for lack of asthma control, ACQ6 ≥0.8                                                                                                                                                                                                                                                                                                                                                |
|                     | EXCLUSION severe comorbidity e.g. patients with short life expectancy due to terminal illness, or severe physical impairments or mental disease which might interfere with trial participation, current participation in another pulmonary research project, trained in breathing exercises by physiotherapist within 6 months                                                                                                     |
| Baskan 2022         | INCLUSION age 18 to 60 years, bronchodilator >6 months                                                                                                                                                                                                                                                                                                                                                                             |

|                     |                                                                                                                                                                                                                                                                                                  |
|---------------------|--------------------------------------------------------------------------------------------------------------------------------------------------------------------------------------------------------------------------------------------------------------------------------------------------|
|                     | EXCLUSION one or more severe and/or uncontrolled comorbid conditions (heart failure, dementia, hemiplegia, malignant tumour, moderate and severe liver or kidney failure), psychiatric condition, pregnant, breastfeeding                                                                        |
| Bhatt 2016          | INCLUSION not reported                                                                                                                                                                                                                                                                           |
|                     | EXCLUSION complicating coronary artery disease, valvular heart diseases, hypertension, diabetes mellitus and any other systemic illness                                                                                                                                                          |
| Bidwell 2012        | INCLUSION FER <0.8, daily use of bronchodilator, symptoms of wheezing and/or coughing for ≥2 years that improves either spontaneously or with drug therapy                                                                                                                                       |
|                     | EXCLUSION hypertension, major orthopaedic injuries prohibiting the performance of various yoga postures, taking any medications that would alter autonomic function, participation in yoga therapy within 12 months, current smoker ≥2 cigarettes/day                                            |
| Bruton 2018         | INCLUSION age 16 to 70 years, ≥1 anti-asthma medication prescription in previous year, AQLQ score <5.5                                                                                                                                                                                           |
|                     | EXCLUSION documented diagnosis of COPD, asthma in need of urgent medical review at baseline                                                                                                                                                                                                      |
| Cooper 2003         | INCLUSION age 18 to 70 years, pre-bronchodilator FEV <sub>1</sub> ≥50% predicted, stable clinical condition over previous 4 weeks (inhaled β <sub>2</sub> agonist ≥2 per week, regular inhaled corticosteroids, no change in dose), mean daily symptom score ≥1, non-smoker                      |
|                     | EXCLUSION taking treatment other than sodium cromoglycate                                                                                                                                                                                                                                        |
| Coulson 2022        | INCLUSION age ≥65 years, persistent asthma (daily need for controller medication)                                                                                                                                                                                                                |
|                     | EXCLUSION other significant respiratory disease, significant cognitive impairment which might interfere with trial participation, current participation in another research study, already performing breathing exercises independently, current smoker or >20 pack-year smoking history         |
| Fluge 1994          | INCLUSION mild disease severity                                                                                                                                                                                                                                                                  |
|                     | EXCLUSION exacerbation 8 weeks before the beginning of the study, cardiopulmonary complications due to asthma, current smoker                                                                                                                                                                    |
| Georga 2019         | INCLUSION age ≥18 years                                                                                                                                                                                                                                                                          |
|                     | EXCLUSION change in asthma medication within 1 month, diseases or syndromes with symptoms similar to asthma, use of psychotropic medication, asthma symptoms due to non-respiratory causes (e.g. left ventricular failure), use of another stress-management technique (e.g. autogenic training) |
| Girodo 1992         | INCLUSION not reported                                                                                                                                                                                                                                                                           |
|                     | EXCLUSION history of allergies, severe asthma, chest disease, diabetes, inability to make 26-week commitment                                                                                                                                                                                     |
| Grammatopoulou 2011 | INCLUSION adults, stable clinical condition                                                                                                                                                                                                                                                      |
|                     | EXCLUSION age ≥60 years, use of oral corticosteroids within 3 months, heart failure, previous participation in an asthma education program, current smoker                                                                                                                                       |
| Gupta 2015          | INCLUSION age 20-55 years                                                                                                                                                                                                                                                                        |
|                     | EXCLUSION chronic chest infections, chest deformity, hypertension, diabetes, history of cigarette smoking                                                                                                                                                                                        |

|                 |                                                                                                                                                                                                                                                                                                                                                                                                                                                                   |
|-----------------|-------------------------------------------------------------------------------------------------------------------------------------------------------------------------------------------------------------------------------------------------------------------------------------------------------------------------------------------------------------------------------------------------------------------------------------------------------------------|
| Holloway 2007   | INCLUSION age 16-70 years, mild to moderate disease severity, commitment to participate for possibly 8 attendances, no serious comorbidity                                                                                                                                                                                                                                                                                                                        |
|                 | EXCLUSION                                                                                                                                                                                                                                                                                                                                                                                                                                                         |
| Lathadevi 2012  | INCLUSION "uncomplicated"                                                                                                                                                                                                                                                                                                                                                                                                                                         |
|                 | EXCLUSION other lung disorders, acute exacerbation of asthma, current smoker                                                                                                                                                                                                                                                                                                                                                                                      |
| Laurino 2012    | INCLUSION $\geq 3$ symptoms of panic and agoraphobia, persistent fear of public places or open areas or the need to be removed from fear situations that trigger the crisis                                                                                                                                                                                                                                                                                       |
|                 | EXCLUSION not reported                                                                                                                                                                                                                                                                                                                                                                                                                                            |
| Lehrer 1997     | INCLUSION abnormal spirometry ( $FEV_1 < 80\%$ or $FEF_{50\%} < 60\%$ ) over previous 12 months                                                                                                                                                                                                                                                                                                                                                                   |
|                 | EXCLUSION history of chronic bronchitis or sinusitis, history or physical findings consistent with emphysema or non-asthma respiratory disease, cardiovascular or neurological disease, or a psychiatric disorder requiring the administration of psychoactive medication or might interfere with trial participation, previous training in self-regulation procedure (biofeedback, relaxation, yoga, tai-chi, etc.), history of cigarette smoking within 2 years |
| Lehrer 2004     | INCLUSION age 18 to 65 years                                                                                                                                                                                                                                                                                                                                                                                                                                      |
|                 | EXCLUSION disorder that would impede performing the biofeedback procedures, abnormal diffusing capacity, current practice of any relaxation, biofeedback or breathing technique                                                                                                                                                                                                                                                                                   |
| Meuret 2007     | INCLUSION age 18 to 60 years, non-smoker                                                                                                                                                                                                                                                                                                                                                                                                                          |
|                 | EXCLUSION use of oral corticosteroids within 3 months, cardiovascular disease, neurological disorders, clinically significant levels of depression, or lifetime diagnosis of schizophrenia, dementia or psychosis                                                                                                                                                                                                                                                 |
| Opat 2000       | INCLUSION age 18 to 50 years                                                                                                                                                                                                                                                                                                                                                                                                                                      |
|                 | EXCLUSION regularly taking oral corticosteroids or $>1600$ micrograms of inhaled steroid per day, taking $<3$ doses of inhaled bronchodilator medication per week, severe asthma exacerbation within 6 weeks, previous Buteyko technique training                                                                                                                                                                                                                 |
| Pourdowlat 2019 | INCLUSION not reported                                                                                                                                                                                                                                                                                                                                                                                                                                            |
|                 | EXCLUSION any condition pretending asthma and its respiratory manifestations, infection, chronic disease                                                                                                                                                                                                                                                                                                                                                          |
| Prasanna 2015   | INCLUSION age 25 to 60 years, newly diagnosed                                                                                                                                                                                                                                                                                                                                                                                                                     |
|                 | EXCLUSION chronic asthma, current smoker                                                                                                                                                                                                                                                                                                                                                                                                                          |
| Prem 2013       | INCLUSION age 18 to 60 years, AQLQ score $<5.5$ ; bronchodilator $>6$ months; no exacerbation in preceding 8 weeks                                                                                                                                                                                                                                                                                                                                                |
|                 | EXCLUSION medical conditions which might interfere with trial participation, non-compliance $>15\%$ of study period, previous breathing retraining, pregnant                                                                                                                                                                                                                                                                                                      |
| Pushpa 2018     | INCLUSION age 18 to 50 years, diagnosis $\geq 6$ months, mild to moderate disease severity, inhaled $\beta$ -agonist with stable medication dose for past month                                                                                                                                                                                                                                                                                                   |

|                     |                                                                                                                                                                                                                                                                                                                                                                                                           |
|---------------------|-----------------------------------------------------------------------------------------------------------------------------------------------------------------------------------------------------------------------------------------------------------------------------------------------------------------------------------------------------------------------------------------------------------|
|                     | EXCLUSION concomitant respiratory disease, history of tuberculosis, status asthmaticus, chronic medical condition that required oral/systemic steroids in the past months, medical condition that contraindicated exercise, diabetes mellitus, renal failure, coronary artery disease, musculoskeletal deformities, participation in yoga or similar discipline within 6 months, current smoker, pregnant |
| Sabina 2005         | INCLUSION age $\geq 18$ years, mild to moderate disease severity $\geq 6$ months; taking $\geq 1$ of inhaled $\beta$ -agonists, methyl-methylxanthines, anticholinergics, ICS, leUnited Kingdomotriene inhibitors or receptor antagonists, or mast cell-stabilizing agents $\geq 6$ months, stable medication dosing for past month                                                                       |
|                     | EXCLUSION concomitant respiratory disease, only exercise-induced asthma, chronic medical condition that required oral corticosteroids in past month, medical condition that contraindicated exercise, unstable medical condition, participation in yoga within 3 years, current smoker (or in past year), smoking history $>5$ pack-years, pregnant                                                       |
| Sangeethalaxmi 2022 | INCLUSION age 18-30 years, mild to moderate disease severity, not previously receiving yoga therapy, non-smokers or not smoked for $\geq 6$ months                                                                                                                                                                                                                                                        |
|                     | EXCLUSION severe asthma, associated chronic respiratory disease, hypertensive, acute infection within 6 weeks, other serious systemic illness, e.g. hepatic, renal, cardiac or central nervous system, major psychiatric illness, pregnant, breastfeeding                                                                                                                                                 |
| Satpathy 2016       | INCLUSION symptoms $\geq 6$ months despite optimum therapy                                                                                                                                                                                                                                                                                                                                                |
|                     | EXCLUSION acute infection within 6 weeks, serious systemic illness (hepatic, renal, cardiac or central nervous system), cardiovascular diseases including hypertension, smoking within the past year                                                                                                                                                                                                      |
| Singh 2012          | INCLUSION age 18 to 60 years, mild to moderate disease severity, non-smoker                                                                                                                                                                                                                                                                                                                               |
|                     | EXCLUSION history of exacerbation or respiratory tract infections, any other disorder, pregnant, breastfeeding                                                                                                                                                                                                                                                                                            |
| Slader 2006         | INCLUSION age 15 to 80 years, stable sub optimally controlled asthma, as-needed reliever use $\geq 4$ occasions/week, use of ICS ( $\geq 200$ mg/day $\geq 3$ months, no dose change during previous 4 weeks), FEV <sub>1</sub> $>50\%$ and $<90\%$ predicted or FER $<0.7$ , daily access to television/video player                                                                                     |
|                     | EXCLUSION recently unstable asthma, previous Buteyko technique training, current smoker or ex-smokers $\geq 10$ pack-year                                                                                                                                                                                                                                                                                 |
| Sodhi 2014          | INCLUSION age 17 to 50 years, "well controlled", non-smoker                                                                                                                                                                                                                                                                                                                                               |
|                     | EXCLUSION history of tuberculosis, COPD, respiratory tract infection within 6 weeks, diabetes, renal failure, coronary artery disease and musculoskeletal chest deformities, current participation in regular exercise training                                                                                                                                                                           |
| Turan 2020          | INCLUSION age 18 to 55 years, diagnosed $\geq 6$ months, living in the city centre                                                                                                                                                                                                                                                                                                                        |
|                     | EXCLUSION another respiratory system disease, current exacerbation, physical disease or cognitive deficiency, psychiatric disease diagnosis which might interfere with trial participation, participation in regular exercise program within 6 months                                                                                                                                                     |
| Vedanthan 1998      | INCLUSION not reported                                                                                                                                                                                                                                                                                                                                                                                    |
|                     | EXCLUSION not reported                                                                                                                                                                                                                                                                                                                                                                                    |
| Vempati 2009        | INCLUSION age $\geq 18$ years, mild to moderate disease severity $\geq 6$ months, taking $\geq 1$ of inhaled $\beta$ -agonists, methyl-methylxanthines, anticholinergics and ICS, stable medication for past month                                                                                                                                                                                        |



|                   |                                                                                                                                                                                                                                                                                                                                                                                                                                   |
|-------------------|-----------------------------------------------------------------------------------------------------------------------------------------------------------------------------------------------------------------------------------------------------------------------------------------------------------------------------------------------------------------------------------------------------------------------------------|
|                   | EXCLUSION concomitant respiratory disease, chronic medical condition requiring oral or systemic corticosteroids in the past month, medical condition that contraindicated exercise, unstable medical condition, taking leUnited Kingdomotriene inhibitors or receptor antagonists or mast cell-stabilising agents ≥6 months, participation in yoga or similar discipline within 6 months, smoking history >5 pack-years, pregnant |
| Yuce 2020         | INCLUSION age ≥18 years, "chronic asthma" for 6 months, asthmas were not /partly under control, β2 agonist and/or inhaling corticosteroid ≥2x/week, inhaler bronchodilator stable dose past month                                                                                                                                                                                                                                 |
|                   | EXCLUSION diseases such as COPD, tuberculosis, respiratory infection, diabetes and coronary artery disease, those who did not participate in >15% of the applications were excluded, current participation in regular exercise training or complementary and integrative health applications, current smoker, pregnant, breastfeeding                                                                                             |
| ILD (n=1)         |                                                                                                                                                                                                                                                                                                                                                                                                                                   |
| Shen L 2021       | INCLUSION age 50 to 80 years, no other ILDs with known causes, including family history, occupational exposure, connective tissue disease, and drug-related toxic side effects                                                                                                                                                                                                                                                    |
|                   | EXCLUSION no respiratory or systemic infection within 4 weeks, malignant tumour, severe disease in other system, organ dysfunction, unable to tolerate the breathing exercise, poor compliance, participation in other clinical trials within 3 months, pregnant, breastfeeding, planning to become pregnant, or unable to use effective contraception                                                                            |
| Mixed COPD/asthma |                                                                                                                                                                                                                                                                                                                                                                                                                                   |
| Ozer 2021         | INCLUSION age 18 to 55 years, diagnosed ≥6 months                                                                                                                                                                                                                                                                                                                                                                                 |
|                   | EXCLUSION any respiratory system diseases than asthma and COPD, no current exacerbation, physical or psychiatric disease or cognitive disability to prevent understanding the training, any disease that cause sleeplessness, using sleeping pills, internet access, able to use the internet, ability to download and use ZOOM program on telephone/computer, participation in similar exercise program within 6 months          |

Supplementary Table 4. Descriptive results for critical outcome: Breathlessness

|              | Diagnosis | Timepoint         | Outcome measure              | Intervention |             | Comparator |             | Between-group difference MD (95% CI) |
|--------------|-----------|-------------------|------------------------------|--------------|-------------|------------|-------------|--------------------------------------|
|              |           |                   |                              | n            | Mean (SD)   | n          | Mean (SD)   |                                      |
| Chauhan 1992 | COPD      | 8 weeks           | Visual analogue scale rating | 11           | Median 30   | 11         | Median 36.5 | Median difference -9 (-18 to -1)     |
| Collins 2008 | COPD      | 12 weeks          | Borg score at isotime        | 17           | 1.3 (1.4)   | 16         | 2.2 (2.4)   | -0.9 (-2.25 to 0.45)                 |
| Collins 2014 | COPD      | 6 -week follow-up | CRQ dyspnoea domain score    | 31           | 4.52 (1.26) | 25         | 4.00 (1.38) | 0.52 (-0.18 to 1.22)                 |
| Donesky 2012 | COPD      | 12 weeks          | CRQ dyspnoea domain score    | 5            | 3.36 (1.26) | 9          | 3.04 (1.32) | 0.32 (-1.08 to 1.72)                 |

|                     |        |          |                              |    |             |    |               |                           |
|---------------------|--------|----------|------------------------------|----|-------------|----|---------------|---------------------------|
| Feng 2010a          | COPD   | 4 weeks  | mMRC scale                   | 30 | 1.15 (0.7)  | 29 | 2.64 (0.35)   | -1.49 (-1.67 to -1.31)    |
| Feng 2010b          |        |          |                              | 30 | 1.98 (0.24) |    |               | -0.66 (-0.81 to -0.51)    |
| Grammatopoulou 2011 | Asthma | 6 months | mMRC scale                   | 20 | 1.05 (0.22) | 20 | 1.25 (0.64)   | -0.20 (-0.50 to 0.10)     |
| Nese 2022           | COPD   | 10 weeks | D12 physical subscale score  | 38 | 5.84 (3.94) | 39 | 17.26 (7.84)  | -11.42 (-14.18 to -8.66)  |
|                     |        |          | D12 emotional subscale score |    | 2.58 (3.11) |    | 9.62 (5.41)   | -7.04 (-9.00 to -5.08)    |
|                     |        |          | D12 total score              |    | 8.42 (6.53) |    | 25.87 (11.99) | -17.45 (-21.75 to -13.15) |
| Nield 2007          | COPD   | 12 weeks | SOB-Q score                  | 10 | 59 (17)     | 9  | 69 (24)       | -10 (-28.9 to 8.9)        |
| Zhang 2008a         | COPD   | 8 weeks  | mMRC scale                   | 17 | 1.94 (1.19) | 15 | 3.4 (0.91)    | -1.46 (-2.19 to -0.73)    |
| Zhang 2008b         |        |          |                              | 15 | 2.4 (1.12)  |    |               | -1.00 (-1.73 to -0.27)    |

Supplementary Table 5. Descriptive results for important outcome: Health-related quality of life

|                 | Diagnosis | Timepoint          | Outcome measure                 | Intervention |                               | Comparator |                                | Between-group difference MD (95% CI) |
|-----------------|-----------|--------------------|---------------------------------|--------------|-------------------------------|------------|--------------------------------|--------------------------------------|
|                 |           |                    |                                 | n            | Mean (SD)                     | n          | Mean (SD)                      |                                      |
| Agnihotri 2017  | Asthma    | 6 months           | AQLQ total score                | 125          | 5.72 (0.38)                   | 130        | 5.43 (0.34)                    | 0.29 (0.20 to 0.38)                  |
|                 |           |                    | AQLQ symptoms subdomain score   |              | 5.61 (0.45)                   |            | 5.32 (0.32)                    | 0.29 (0.19 to 0.39)                  |
|                 |           |                    | AQLQ activities subdomain score |              | 6.07 (0.21)                   |            | 5.75 (0.26)                    | 0.32 (0.26 to 0.38)                  |
|                 |           |                    | AQLQ emotion subdomain score    |              | 5.74 (0.39)                   |            | 5.27 (0.41)                    | 0.47 (0.37 to 0.57)                  |
|                 |           |                    | AQLQ environment domain score   |              | 5.44 (0.06)                   |            | 5.31 (0.16)                    | 0.13 (0.10 to 0.16)                  |
| Andreasson 2022 | Asthma    | 12 weeks           | Mini-AQLQ score                 | 94           | MD 0.72 (95% CI 0.51 to 0.92) | 99         | MD 0.16 (95% CI -0.04 to 0.35) | 0.56 (0.28 to 0.85)                  |
|                 |           | 6-month follow-up  |                                 |              | MD 0.65 (95% CI 0.46 to 0.85) |            | MD 0.31 (95% CI 0.12 to 0.49)  | 0.35 (0.07 to 0.62)                  |
|                 |           | 12-month follow-up |                                 |              | MD 0.76 (95% CI 0.57 to 0.95) |            | MD 0.38 (95% CI 0.19 to 0.56)  | 0.38 (0.12 to 0.65)                  |
| Bidwell 2012    | Asthma    | 10 weeks           | SGRQ total score                | 12           | MD 16.01 (SE 3)               | 8          | MD 31.85 (SE 5)                | -15.84 (-27.27 to -4.41)             |
| Bruton 2018a    | Asthma    | 12 months          | AQLQ total score                | 261          |                               | 262        |                                | 0.28 (0.11 to 0.44)                  |
|                 |           |                    | AQLQ symptoms subdomain score   |              |                               |            |                                | 0.24 (0.05 to 0.42)                  |
|                 |           |                    | AQLQ activities subdomain score |              |                               |            |                                | 0.21 (0.04 to 0.41)                  |
|                 |           |                    | AQLQ emotion subdomain score    |              |                               |            |                                | 0.38 (0.16 to 0.60)                  |
|                 |           |                    | AQLQ environment domain score   |              |                               |            |                                | 0.32 (0.11 to 0.53)                  |
| Bruton 2018b    | Asthma    | 12 months          | AQLQ total score                | 132          |                               | 262        |                                | 0.24 (0.04 to 0.44)                  |
|                 |           |                    | AQLQ symptoms subdomain score   |              |                               |            |                                | 0.27 (0.04 to 0.49)                  |

|              |        |          |                                                        |    |                                |    |                                 |                                                                                                  |
|--------------|--------|----------|--------------------------------------------------------|----|--------------------------------|----|---------------------------------|--------------------------------------------------------------------------------------------------|
|              |        |          | AQLQ activities subdomain score                        |    |                                |    |                                 | 0.08 (-0.14 to 0.31)                                                                             |
|              |        |          | AQLQ emotion subdomain score                           |    |                                |    |                                 | 0.43 (0.16 to 0.71)                                                                              |
|              |        |          | AQLQ environment domain score                          |    |                                |    |                                 | 0.19 (-0.06 to 0.44)                                                                             |
| Chauhan 1992 | COPD   | 8 weeks  | Visual analogue scale rating                           | 11 | Median 48                      | 11 | Median 40                       | Median difference 9 (-3 to 21)                                                                   |
| Collins 2014 | COPD   | 8 weeks  | CRQ fatigue domain score                               | 31 | 4.125 (1.475)                  | 25 | 4.575 (1.3)                     | -0.45 (-1.18 to 0.28)                                                                            |
|              |        |          | CRQ emotional function domain score                    |    | 5.029 (1.343)                  |    | 5.471 (1.1)                     | -0.44 (-1.08 to 0.20)                                                                            |
|              |        |          | CRQ mastery domain score                               |    | 5.45 (1.125)                   |    | 5.6 (1.25)                      | -0.15 (-0.78 to 0.48)                                                                            |
| Cooper 2003  | Asthma | 6 months | AQLQ total score                                       | 23 | Median 1.03 [IQR 0.19 to 1.69] | 22 | Median 0.61 [IQR -0.11 to 0.95] | "None of the Asthma Quality of Life questionnaire domains had changed significantly at 6 months" |
|              |        |          | AQLQ symptoms subdomain                                |    | Median 1.08 [IQR 0.08 to 1.92] |    | Median 0.33 [IQR -0.19 to 1.17] |                                                                                                  |
|              |        |          | AQLQ activities subdomain                              |    | Median 0.91 [IQR 0.18 to 1.36] |    | Median 0.50 [IQR 0.09 to 1.14]  |                                                                                                  |
|              |        |          | AQLQ emotion subdomain                                 |    | Median 1.00 [IQR 0.20 to 2.20] |    | Median 0.40 [IQR -0.35 to 1.00] |                                                                                                  |
|              |        |          | AQLQ exposure to environmental stimuli dimension score |    | Median 1.00 [IQR 0.0 to 1.75]  |    | Median 0.38 [IQR -0.25 to 1.06] |                                                                                                  |
|              |        |          | SF36 physical limitations domain                       |    | Median 25.0 [IQR 0.0 to 50.0]  |    | Median 0.0 [IQR -6.3 to 0.0]    |                                                                                                  |
|              |        |          | SF36 physical function dimension score                 |    | Median 5.0 [IQR 0.0 to 5.0]    |    | Median 0.0 [IQR -10.0 to 5.0]   |                                                                                                  |
|              |        |          | SF36 emotional limitations domain score                |    | Median 0.0 [IQR 0.0 to 0.0]    |    | Median 0.0 [IQR 0.0 to 0.0]     |                                                                                                  |

|                     |        |          |                                      |    |                                |    |                                |                                                                                                 |
|---------------------|--------|----------|--------------------------------------|----|--------------------------------|----|--------------------------------|-------------------------------------------------------------------------------------------------|
|                     |        |          | SF36 social performance domain score |    | Median 0.0 [IQR 0.0 to 11.1]   |    | Median 0.0 [IQR -25.0 to 0.0]  | physical problems”) which improved more in the Buteyko technique group at... 6 months (p<0.01)” |
|                     |        |          | SF36 mental health domain score      |    | Median 0.0 [IQR -8.0 to 12.0]  |    | Median 2.0 [IQR -8.0 to 8.0]   |                                                                                                 |
|                     |        |          | SF36 vitality domain score           |    | Median 0.0 [IQR -10.0 to 20.0] |    | Median 0.0 [IQR -10.0 to 10.0] |                                                                                                 |
|                     |        |          | SF36 bodily pain domain score        |    | Median 0.0 [IQR -11.1 to 11.1] |    | Median 0.0 [IQR -11.1 to 11.1] |                                                                                                 |
|                     |        |          | SF36 general health domain score     |    | Median 5.0 [IQR -12.0 to 30.0] |    | Median 0.0 [IQR -5.5 to 5.8]   |                                                                                                 |
|                     |        |          | SF36 change in health domain score   |    | Median 25.0 [IQR 0.0 to 50.0]  |    | Median 0.0 [IQR 0.0 to 25.0]   |                                                                                                 |
| Coulson 2022        | Asthma | 4 weeks  | Mini-AQLQ score                      | 45 | 3.9 (15.6)                     | 45 | 5.9 (14.0)                     | -2.00 (-8.12 to 4.12)                                                                           |
| Donesky 2012        | COPD   | 12 weeks | SF36 mental component score          | 14 | 54.8 (8.0)                     | 15 | 52.3 (9.6)                     | 2.50 (-3.92 to 8.92)                                                                            |
|                     |        |          | SF36 physical component score        |    | 35.4 (9.7)                     |    | 36.8 (8.8)                     | -1.40 (-8.16 to 5.36)                                                                           |
|                     |        |          | CRQ fatigue domain score             |    | 4.2 (1.275)                    |    | 4.075 (1.3)                    | 0.13 (-0.81 to 1.06)                                                                            |
|                     |        |          | CRQ emotional function domain score  |    | 5.057 (0.843)                  |    | 5.014 (0.886)                  | 0.04 (-0.59 to 0.67)                                                                            |
|                     |        |          | CRQ mastery domain score             |    | 5.575 (1)                      |    | 4.85 (1.325)                   | 0.73 (-0.13 to 1.58)                                                                            |
| Georga 2019         | Asthma | 8 weeks  | Mini-AQLQ symptoms subdomain score   | 23 | 0.104 (0.16)                   | 29 | -0.01 (0.46)                   | 0.11 (-0.07 to 0.29)                                                                            |
|                     |        |          | Mini-AQLQ activity subdomain score   |    | 0.17 (0.16)                    |    | 0.01 (0.06)                    | 0.16 (0.09 to 0.23)                                                                             |
|                     |        |          | Mini-AQLQ emotion subdomain score    |    | 0.78 (0.49)                    |    | 0.02 (0.14)                    | 0.76 (0.55 to 0.97)                                                                             |
| Grammatopoulou 2011 | Asthma | 6 months | SF36 mental component score          | 20 | 52.30 (5.40)                   | 20 | 48.79 (6.31)                   | 3.51 (-0.13 to 7.15)                                                                            |

|               |        |                    |                                                        |    |                                |    |                                |                          |
|---------------|--------|--------------------|--------------------------------------------------------|----|--------------------------------|----|--------------------------------|--------------------------|
|               |        |                    | SF36 physical component score                          |    | 46.52 (12.24)                  |    | 48.04 (6.25)                   | -1.52 (-7.54 to 4.50)    |
| Holloway 2007 | Asthma | 6 months           | SGRQ total score                                       | 33 | 15.9 (14.0)                    | 45 | 16.3 (12.2)                    | -0.40 (-6.36 to 5.56)    |
|               |        |                    | SQRQ symptoms domain score                             |    | 21.8 (18.1)                    |    | 32.8 (20.1)                    | -11.00 (-19.52 to -2.48) |
|               |        |                    | SGRQ impact domain score                               |    | 11.5 (11.5)                    |    | 10.8 (11.0)                    | 0.70 (-4.37 to 5.77)     |
|               |        |                    | SGRQ activities domain score                           |    | 20.4 (18.8)                    |    | 17.0 (17.5)                    | 3.40 (-4.80 to 11.60)    |
|               |        | 12-month follow-up | SGRQ total score                                       | 32 | 15.2 (10.9)                    | 40 | 16.7 (11.6)                    | -1.50 (-6.71 to 3.71)    |
|               |        |                    | SQRQ symptoms domain score                             |    | 24.9 (17.9)                    |    | 33.5 (15.9)                    | -8.60 (-16.52 to -0.68)  |
|               |        |                    | SGRQ impact domain score                               |    | 19.0 (15.7)                    |    | 18.4 (18.9)                    | 0.60 (-7.39 to 8.59)     |
|               |        |                    | SGRQ activities domain score                           |    | 10.0 (10.1)                    |    | 10.4 (10.7)                    | -0.4 (-5.2 to 4.4)       |
| Laurino 2012  | Asthma | 12 weeks           | AQLQ "Variation of the domain: adherence to treatment" | 20 | median 99.9 [IQR 99.9 to 4.1]  | 18 | median 83.9 [IQR 99.8 to 66.0] | p=0.05                   |
|               |        |                    | AQLQ "Variation of the domain: severity/frequency"     |    | median 3.7 [IQR 6.0 to 3.4]    |    | median 4.5 [IQR 6.5 to 3.2]    | p=0.012                  |
|               |        |                    | AQLQ "Variation of the domain: physical limitation"    |    | median 18.0 [IQR 26.9 to 10.4] |    | median 26.3 [IQR 36.3 to 12.3] | p=0.001                  |
|               |        |                    | AQLQ "Variation of the domain: psychosocial"           |    | median 54.9 [IQR 73.8 to 36.0] |    | median 48.9 [IQR 62.0 to 36.0] | p=0.01                   |
|               |        |                    | AQLQ "Variation of the domain: social-economic"        |    | median 75.3 [IQR 82.9 to 51.0] |    | median 49.7 [IQR 82.7 to 49.7] | p=0.01                   |
| Lee 2022      | COPD   | 8 weeks            | CAT                                                    | 8  | 4.2 (5.2)                      | 9  | 1.0 (2.2)                      | 3.20 (-0.68 to 7.08)     |

|                 |        |          |                                         |    |                  |    |                  |                           |
|-----------------|--------|----------|-----------------------------------------|----|------------------|----|------------------|---------------------------|
| Li 2018         | COPD   | 6 months | SGRQ total score                        | 17 | -16.18 (SE 2.4)  | 19 | 3.84 (SE 2.88)   | -22.76 (-29.06 to -16.46) |
|                 |        |          | SQRQ symptoms domain score              |    | -26.18 (SE 4.33) |    | 5.95 (SE 2.8)    | -30.02 (-40.21 to -19.83) |
|                 |        |          | SGRQ impact domain score                |    | -13.24 (SE 2.99) |    | 8.32 (SE 2.46)   | -19.19 (-27.22 to -11.16) |
|                 |        |          | SGRQ activities domain score            |    | -16.12 (SE 3.64) |    | 6.58 (SE 2.14)   | -24.44 (-33.05 to -15.83) |
| Nield 2007      | Asthma | 12 weeks | SF36 physical function                  | 10 | 37 (24)          | 9  | 31 (18)          | 6.00 (-12.96 to 24.96)    |
| Opat 2000       | Asthma | 4 weeks  | AQLQ total score                        | 18 |                  | 18 |                  | -1.29 (-2.53 to -0.05)    |
|                 |        |          | AQLQ symptoms subdomain score           |    |                  |    |                  | -1.53 (-3.06 to 0.00)     |
|                 |        |          | AQLQ activities subdomain score         |    |                  |    |                  | -1.16 (-2.54 to 0.22)     |
|                 |        |          | AQLQ emotion subdomain score            |    |                  |    |                  | -1.59 (-3.04 to -0.15)    |
|                 |        |          | AQLQ environment domain score           |    |                  |    |                  | -0.87 (-2.18 to 0.44)     |
| Pourdowlat 2019 | Asthma | 6 weeks  | SF36 general health domain score        | 30 | 68.33 (SE 16.33) | 39 | 64.27 (SE 20.38) | 4.06 (-47.13 to 55.25)    |
|                 |        |          | SF36 physical performance domain score  |    | 55.33 (SE 21.08) |    | 22.40 (SE 29.31) | 32.93 (-37.83 to 103.69)  |
|                 |        |          | SF36 physical limitations domain score  |    | 82.27 (SE 20.37) |    | 43.00 (SE 36.98) | 39.27 (-43.48 to 122.02)  |
|                 |        |          | SF36 emotional limitations domain score |    | 64.73 (SE 19.70) |    | 47.13 (SE 18.16) | 17.60 (-34.91 to 70.11)   |
|                 |        |          | SF36 bodily pain domain score           |    | 63.40 (SE 14.60) |    | 62.80 (SE 14.06) | 0.60 (-39.13 to 40.33)    |

|             |        |           |                                      |    |                     |    |                      |                           |
|-------------|--------|-----------|--------------------------------------|----|---------------------|----|----------------------|---------------------------|
|             |        |           | SF36 social performance domain score |    | 66.33 (SE 17.26)    |    | 47.33 (SE 22.78)     | 19.00 (-37.02 to 75.02)   |
|             |        |           | SF36 vitality domain score           |    | 74.73 (SE 14.44)    |    | 48.27 (SE 31.5)      | 26.46 (-41.46 to 94.38)   |
|             |        |           | SF36 mental health domain score      |    | 71.53 (SE 14.34)    |    | 36.33 (SE 19.61)     | 35.20 (-12.41 to 82.81)   |
|             |        |           | SF36 quality of life domain score    |    | 546.67 (SE 90.12)   |    | 352.53 (SE 99.91)    | 194.14 (-69.57 to 457.85) |
| Prem 2012a  | Asthma | 12 weeks  | AQLQ total score                     | 39 |                     | 40 |                      | 0.97 (0.48 to 1.46)       |
|             |        |           | AQLQ symptoms subdomain score        |    |                     |    | 1.01 (0.44 to 1.59)  |                           |
|             |        |           | AQLQ activities subdomain score      |    |                     |    | 1.32 (0.81 to 1.83)  |                           |
|             |        |           | AQLQ emotion subdomain score         |    |                     |    | 0.65 (-0.01 to 1.31) |                           |
|             |        |           | AQLQ environment domain score        |    |                     |    | 0.91 (0.13 to 1.69)  |                           |
| Prem 2012b  | Asthma | 12 weeks  | AQLQ total score                     | 36 |                     | 40 |                      | 0.50 (0.01 to 0.98)       |
|             |        |           | AQLQ symptoms subdomain score        |    |                     |    | 0.69 (0.13 to 1.26)  |                           |
|             |        |           | AQLQ activities subdomain score      |    |                     |    | 0.79 (0.28 to 1.30)  |                           |
|             |        |           | AQLQ emotion subdomain score         |    |                     |    | 0.17 (-0.48 to 0.83) |                           |
|             |        |           | AQLQ environment domain score        |    |                     |    | 0.33 (-0.43 to 1.10) |                           |
| Sabina 2005 | Asthma | 16 weeks  | Mini-AQLQ                            | 29 | 0.57 (SE 0.37)      | 33 | 0.35 (SE 0.16)       | 0.22 (-0.57 to 1.01)      |
| Shen 2021   | ILD    | 12 months | SGRQ total score                     | 30 | -3.723 (10.35)      | 29 | 4.806 (10.359)       | -8.53 (-13.81 to -3.24)   |
| Slader 2006 | Asthma | 28 weeks  | AQLQ total score                     | 23 | 0.60 (0.39 to 0.81) | 25 | 0.44 (0.27 to 0.62)  | 0.14 (-0.11 to 0.38)      |



|                 |        |         |                                 |    |                     |    |                     |                        |
|-----------------|--------|---------|---------------------------------|----|---------------------|----|---------------------|------------------------|
|                 |        |         | ACQ7 score                      |    | 1.08 (0.80 to 1.37) |    | 1.05 (0.77 to 1.32) | 0.11 (-0.20 to 0.43)   |
| van Gestel 2012 | COPD   | 4 weeks | CRQ total score                 | 20 | 0.648 (0.85)        | 20 | 0.488 (0.85)        | 0.17 (-0.10 to 0.43)   |
| Yuce 2020       | Asthma | 4 weeks | AQLQ total score                | 25 | 4.44 (1.20)         | 25 | 5.34 (1.05)         | -0.90 (-1.53 to -0.27) |
|                 |        |         | AQLQ symptoms subdomain score   |    | 6.44 (0.44)         |    | 5.48 (1.21)         | 0.96 (0.46 to 1.46)    |
|                 |        |         | AQLQ activities subdomain score |    | 6.07 (0.69)         |    | 5.13 (1.07)         | 0.94 (0.44 to 1.44)    |
|                 |        |         | AQLQ emotion subdomain score    |    | 6.60 (0.57)         |    | 5.46 (1.50)         | 1.14 (0.51 to 1.77)    |
|                 |        |         | AQLQ environment domain score   |    | 6.14 (0.82)         |    | 5.36 (1.27)         | 0.78 (0.19 to 1.37)    |

Supplementary Table 6. Descriptive results for critical outcome: Adverse events

| Study         | Diagnosis | Timepoint | Outcome measure                                                                                          | Intervention                     | Comparator                       | Odds ratio (95% CI) |
|---------------|-----------|-----------|----------------------------------------------------------------------------------------------------------|----------------------------------|----------------------------------|---------------------|
| Ceyhan        | COPD      | 4 weeks   | “withdrawal from follow-up due to other illnesses”                                                       | 3/32                             | 1/35                             |                     |
| Lehrer 2004   | Asthma    | 10 weeks  | Number of participants requiring oral corticosteroids                                                    | 2/24                             | 4/24                             | 0.45 (0.08 to 2.76) |
| Lin 2019      | COPD      | 8 weeks   | “discontinuation of intervention due to illness”                                                         | 1/38                             | 1/40                             |                     |
| Opat 2000     | Asthma    | 4 weeks   | Number of participants with admission for severe exacerbation                                            | 0/16                             | 1/16                             | 0.31 (0.01 to 8.28) |
| Peng 2021     | COPD      | 4 weeks   | Number of participants with “adverse reactions”                                                          | 4/50                             | 12/50                            | 0.28 (0.08 to 0.92) |
| Prem 2012     | Asthma    | 12 weeks  | Number of participants with exacerbation                                                                 | 5/39                             | 8/40                             | 0.59 (0.17 to 1.99) |
| Saunders      | COPD      | 12 weeks  | Number of participants with “chest cold (defined as increased cough and phlegm for three weeks or more)” | 19 (group numbers not described) | 18 (group numbers not described) |                     |
| Yamaguti 2012 | COPD      | 4 weeks   | ‘protocol deviations...because of either an acute COPD exacerbation or other health problems’            | 0/15                             | 3/15                             |                     |

Supplementary Table 7. Sensitivity Analyses.

|                                          | Number of RCTs | Participants | Mean difference (95% confidence interval) | I <sup>2</sup> |
|------------------------------------------|----------------|--------------|-------------------------------------------|----------------|
| <b>Breathlessness</b>                    |                |              |                                           |                |
| <b>Breathing exercises vs usual care</b> |                |              |                                           |                |
| mMRC dyspnoea scale                      | 3              | 87           | 0.07 (-1.33 to 1.47)                      | 0%             |
| <b>Health-related quality of life</b>    |                |              |                                           |                |
| <b>Breathing exercises vs usual care</b> |                |              |                                           |                |
| SGRQ total score                         | 4              | 240          | -7.28 (-20.49 to 5.93)                    | 96%            |
| SGRQ symptoms                            | 2              | 193          | -11.59 (-23.73 to 0.56)                   | 97%            |
| SGRQ impact                              | 2              | 193          | -6.99 (-21.69 to 7.70)                    | 97%            |
| SGRQ activities                          | 2              | 193          | -7.46 (-25.49 to 10.57)                   | 98%            |
| <b>Yoga breathing vs usual care</b>      |                |              |                                           |                |
| SGRQ symptoms                            | 2              | 91           | -2.5 (-14.04 to 9.04)                     | 73%            |

All sensitivity analyses conducted by removal of trials that lacked assessor blinding.

mMRC – modified Medical Research Council; SGRQ – St George Respiratory Questionnaire.

## List of included studies

- Agnihotri, S., Kant, S., Mishra, S., & Verma, A. (2017). Assessment of significance of yoga on quality of life in asthma patients: A randomized controlled study. *An International Quarterly Journal of Research in Ayurveda*, 38(1-2), 28. [https://doi.org/10.4103/ayu.AYU\\_3\\_16](https://doi.org/10.4103/ayu.AYU_3_16)
- Ambrosino, N., Paggiaro, P., Maccchi, M., Filieri, M., Toma, G., Aghini Lombardi, F., Del Cesta, F., Parlanti, A., Loi, A., & Baschieri, L. (1981). A study of short-term effect of rehabilitative therapy in chronic obstructive pulmonary disease. *Respiration*, 41, 40-44.
- Andreasson, K., Skou, S., Ulrik, C., Madsen, H., Sidenius, K., Assing, K., Porsbjerg, C., Bloch-Nielsen, J., Thomas, M., & Bodtger, U. (2022). Breathing exercises for patients with asthma in specialist care: A multicenter randomized clinical trial. *Annals of the American Thoracic Society*, 19(9), 1498-1506. <https://doi.org/10.1513/AnnalsATS.202111-1228OC>
- Baskan, B., Alptekin, K., Pur Ozyigit, L., & Oncu Alptekin, J. (2022). The impact of breathing exercises on quality of life and anxiety in asthma patients. *Gazetta Medica Italiana - Archivio per le Scienze Mediche*, 181(2), 59-65. <https://doi.org/10.23736/S0393-3660.19.04293-1>
- Bhatt, A., & Rampallivar, S. (2016). Effect of pranayam on ventilatory functions in patients of bronchial asthma. *Journal of Evolution of Medical and Dental Sciences*, 5(28), 1453-1455. <https://doi.org/10.14260/jemds/2016/341>
- Bidwell, A., Yazel, B., Davin, D., Fairchild, T., & Kanaley, J. (2012). Yoga training improves quality of life in women with asthma. *The Journal of Alternative and Complementary Medicine*, 18(8), 749-755. <https://doi.org/10.1089/acm.2011.0079>
- Bruton, A., Lee, A., Yardley, L., Raftery, J., Arden-Close, E., Kirby, S., Zhu, S., Thiruvothiur, M., Webley, F., Taylor, L., Gibson, D., Yao, G., Stafford-Watson, M., Versnel, J., Moore, M., George, S., Little, P., Djukanovic, R., Price, D., Pavord, I., Holgate, S., & Thomas, M. (2018). Physiotherapy breathing retraining for asthma: A randomised controlled trial. *Lancet Respiratory Medicine*, 6, 19-28. [https://doi.org/10.1016/S2213-2600\(17\)30474-5](https://doi.org/10.1016/S2213-2600(17)30474-5)
- Ceyhan, Y., & Tekinsoy Kartir, P. (2022). The effects of breathing exercises and inhaler training in patients with COPD on the severity of dyspnea and life quality: A randomized controlled trial. *Trials*, 23(1), 707. <https://doi.org/10.1186/s13063-022-06603-3>
- Chan, A., Lee, A., Suen, L., & Tam, W. (2010). Effectiveness of a Tai chi Qigong program in promoting health-related quality of life and perceived social support in chronic obstructive pulmonary disease clients. *Quality of Life Research*, 19, 653-664.
- Chauhan, A., McLindon, J., Dillon, P., Sawyer, J., Gray, L., & Leahy, B. (1992). Regular balloon inflation for patients with chronic bronchitis: A randomised controlled trial. *British Medical Journal* 304, 1668-1669.
- Collins, E., Jelinek, C., O'Connell, S., Butler, J., McBurney, C., Gozali, C., Reda, D., & Laghi, F. (2014). Contrasting breathing retraining and helium-oxygen during pulmonary rehabilitation in COPD: A randomized clinical trial. *Respiratory medicine*, 108(2), 297-306. <https://doi.org/10.1016/j.rmed.2013.10.023>
- Collins, E., Jelinek, C., O'Connell, S., Butler, J., Reda, D., & Laghi, F. (2019). The effect of breathing retraining using metronome-based acoustic feedback on exercise endurance in COPD: A randomized trial. *Lung*, 197(2), 181-188. <https://doi.org/10.1007/s00408-019-00198-4>
- Collins, E., Langbein, W., Fehr, L., O'Connell, S., Jelinek, C., Hagarty, E., Lonnie Edwards, L., Reda, D., Tobin, M., & Laghi, F. (2008). Can ventilation-feedback training augment exercise tolerance

- in patients with chronic obstructive pulmonary disease? . *American Journal of Respiratory & Critical Care Medicine* 177, 844-852. <https://doi.org/10.1164/rccm.200703-477OC>
- Cooper, S., Osborne, J., Newton, S., Harrison, V., Thompson Coon, J., Lewis, S., & Tattersfield, A. (2003). Effect of two breathing exercises (Buteyko and pranayama) in asthma: A randomised controlled trial. *Thorax*, 58, 674-679.
- Coulson, E., Carpenter, L., Georgia, T., & Baptist, A. (2022). Breathing exercises in older adults with asthma: A blinded, randomized, placebo-controlled trial. *Journal of Asthma*, 59(7), 1438-1444. <https://doi.org/10.1080/02770903.2021.1936015>
- Dehkordi, A., Ebrahimi-Dehkordi, S., Banitalebi-Dehkordi, F., Tali, S., Kheiri, S., & Babadi, A. (2021). The effect of teach-back training intervention of breathing exercise on the level of dyspnea, six-minutes walking test and FEV1/FVC ratio in patients with chronic obstructive pulmonary disease: A randomized controlled trial. *Expert review of respiratory medicine*, 15(1), 161-169. <https://doi.org/10.1080/17476348.2020.1822740>
- Donesky, D., Nguyen, H., Paul, S., & Carrieri-Kohlman, V. (2009). Yoga therapy decreases dyspnea-related distress and improves functional performance in people with chronic obstructive pulmonary disease: A pilot study. *The Journal of Alternative and Complementary Medicine*, 15(3), 225-234. <https://doi.org/10.1089/acm.2008.0389>
- Feng, J. (2016). The effects of respiratory function training on pulmonary function in patients with severe COPD [Chinese]. *Journal of Frontiers of Medicine* 6, 356-358.
- Feng, X., Zheng, H., Jiang, F., Du, C., Gao, Q., & Liu, X. (2010). Rehabilitational effects of breathing training in patients with stable chronic obstructive pulmonary disease [Chinese]. *Nursing Journal of Chinese People's Liberation Army* 27(2A), 166-168.
- Fluge, T., Ritcher, H., Fabel, H., Zysno, E., Wehner, E., & Wagner, I. (1994). Long term effects of breathing exercises and yoga in patients with asthma [Langzeiteffekte von atemgymnastik und yoga bei patienten mit asthma bronchiale]. *Pneumologie*, 48, 485-490.
- Georga, G., Chrousos, G., Artemiadis, A., Panagiotis, P., Bakakos, P., & Darviri, C. (2019). The effect of stress management incorporating progressive muscle relaxation and biofeedback-assisted relaxation breathing on patients with asthma: A randomised controlled trial. *Advances in Integrative Medicine*, 6(2), 73-77. <https://doi.org/10.1016/j.aimed.2018.09.001>
- Girodo, M., Ekstrand, K., & Metiver, G. (1992). Deep diaphragmatic breathing: Rehabilitation exercises for the asthmatic patient. *Archives of Physiology, Medicine and Rehabilitation*, 73, 717-720.
- Grammatopoulou, E., Skordilis, E., Stavrou, N., Myrianthefs, P., Karteroliotis, K., Baltopoulos, G., & Koutsouki, D. (2011). The effect of physiotherapy-based breathing retraining on asthma control. *Journal of Asthma*, 48(6), 593-601. <https://doi.org/10.3109/02770903.2011.587583>
- Gu, W., Liang, Z., Zhu, C., & Chen, R. (2018). Clinical outcome of a novel breathing training maneuver in stable COPD patients. *International Journal of Clinical and Experimental Medicine*, 11(9), 9802-9810.
- Gupta, N., Kumar, A., Joshi, H., & Sharma, D. (2015). Effect of yoga on spirometric value in bronchial asthma patients. *Global Journal for Research Analysis* 4(7), 231-233. <https://doi.org/10.15373/22778160>
- Holloway, E., & West, R. (2007). Integrated breathing and relaxation training (the Papworth method) for adults with asthma in primary care: A randomised controlled trial. *Thorax*, 62(12), 1039-1042. <https://doi.org/10.1136/thx.2006.076430>

- Kaminsky, D., Guntupalli, K., Lippmann, J., Burns, S., Brock, M., Skelly, J., DeSarno, M., Pecott-Grimm, H., Mohsin, A., LaRock-McMahon, C., Warren, P., Whitney, M., & Hanania, N. (2017). Effect of yoga breathing (pranayama) on exercise tolerance in patients with chronic obstructive pulmonary disease: A randomized, controlled trial. *The Journal of Alternative and Complementary Medicine*, 23(9), 696-704. <https://doi.org/10.1089/acm.2017.0102>
- Katiyar, S., & Bihari, S. (2006). Role of pranayama in the rehabilitation of COPD patients: A randomized controlled study. *Indian Journal of Allergy and Applied Immunology*, 20, 98-104.
- Lathadevi, G., & Uma Maheswari, T. (2012). Evaluation of pulmonary functions in asthmatics after six weeks of ujjayi pranayama and shavasana training. *Biomedicine*, 32(1), 52-56.
- Laurino, R., Barnabe, V., Saraiva-Romanholo, B., Stelmach, R., Cukier, A., & Nunes, M. (2012). Respiratory rehabilitation: A physiotherapy approach to the control of asthma symptoms and anxiety. *Clinics*, 67(11), 1291-1297. [https://doi.org/10.6061/clinics/2012\(11\)12](https://doi.org/10.6061/clinics/2012(11)12)
- Lausin, G., & Gouilly, P. (2009). Study of the effects of controlled abdominodiaphragmatic ventilation in patients with level I and II COPD [Étude des effets de la ventilation dirigée abdomino-diaphragmatique (Vdad) chez des patients BPCO de stade I et II]. *Kinésithérapie, la Revue* 87, 29-38.
- Lee, S., Park, J., Lyu, Y., Lee, E., Kim, S., Kang, W., Son, J., Jung, I., & Park, Y. (2022). The effect of lung-conduction exercise in chronic obstructive pulmonary disease: Randomized, assessor-blind, multicenter pilot trial. *Medicine*, 101(3), e28629. <https://doi.org/10.1097/MD.00000000000028629>
- Lehrer, P., Carr, R., Smetankine, A., Vaschillo, E., Peper, E., Porges, S., Edelberg, R., Hamer, R., & Hochron, S. (1997). Respiratory sinus arrhythmia versus neck/trapezius EMG and incentive spirometry biofeedback for asthma: A pilot study. *Applied Psychophysiology and Biofeedback*, 22(2), 95-109.
- Lehrer, P., Vaschillo, E., Vaschillo, B., Lu, S., Scardella, A., Siddique, M., & Habib, R. (2004). Biofeedback treatment for asthma. *Chest*, 126(2), 352-361.
- Li, P., Liu, J., Lu, Y., Liu, X., Wang, Z., & Wu, W. (2018). Effects of long-term home-based Liuzijue exercise combined with clinical guidance in elderly patients with chronic obstructive pulmonary disease. *Clinical Interventions in Aging*, 13, 1391-1399. <https://doi.org/10.2147/CIA.S169671>
- Li, Y. (2002). Nutritional supplementation and respiratory gym in patients with chronic obstructive pulmonary disease *Zhongguo Linchuang Kangfu (Chinese Journal of Clinical Rehabilitation)* 6, 1260-1262.
- Lin, F., Yeh, M., Lai, Y., Lin, K., Yu, C., & Chang, J. (2019). Two-month breathing-based walking improves anxiety, depression, dyspnoea and quality of life in chronic obstructive pulmonary disease: A randomised controlled study. *Journal of Clinical Nursing*, 28, 3632-3640. <https://doi.org/10.1111/jocn.14960>
- Lin, W., Yuan, S., Chien, J., Weng, S., Chou, M., & Kuo, H. (2012). The effects of respiratory training for chronic obstructive pulmonary disease patients: A randomised clinical trial. *Journal of Clinical Nursing*, 21, 2870-2878. <https://doi.org/10.1111/j.1365-2702.2012.04124.x>
- Liu, F., Cai, H., Tang, Q., Zou, Y., Wang, H., Xu, Z., Wei, Z., Wang, W., & Cui, J. (2013). Effects of an animated diagram and video-based online breathing program for dyspnea in patients with stable COPD. *Patient Preference and Adherence*, 7, 905-913. <https://doi.org/10.2147/PPA.S43305>

- Meuret, A., Ritz, T., Wilhelm, F., & Roth, W. (2007). Targeting pCO<sub>2</sub> in asthma: Pilot evaluation of a capnometry-assisted breathing training. *Applied Psychophysiology and Biofeedback*, 32, 99-109. <https://doi.org/10.1007/s10484-007-9036-8>
- Nese, A., & Baglama, S. (2022). The effect of progressive muscle relaxation and deep breathing exercises on dyspnea and fatigue symptoms of COPD patients: A randomized controlled study. *Holistic Nursing Practice*, 36(4), E18-E26. <https://doi.org/10.1097/HNP.0000000000000531>
- Nield, M., Soo Hoo, G., Roper, J., & Santiago, S. (2007). Efficacy of pursed-lips breathing: A breathing pattern retraining strategy for dyspnea reduction. *Journal of Cardiopulmonary Rehabilitation and Prevention* 27, 237-244.
- Opat, A., Cohen, M., Bailey, M., & Abramson, M. (2000). Clinical trial of the Buteyko breathing technique in asthma as taught by a video. *Journal of Asthma*, 37(7), 557-564. <https://doi.org/10.3109/02770900009090810>
- Ozer, Z., Turan, G., & Aksoy, M. (2021). The effects of yoga on dyspnea, sleep and fatigue in chronic respiratory diseases. *Complementary Therapies in Clinical Practice*, 43, 101306. <https://doi.org/10.1016/j.ctcp.2021.101306>
- Peng, N., Chen, M., & Shou, Z. (2022). Effect of tiotropium bromide, N-acetylcysteine and respiratory training on pulmonary function, activity tolerance and quality of life of patients with chronic obstructive pulmonary disease. *Tropical Journal of Pharmaceutical Research*, 21(3), 649. <https://doi.org/10.4314/tjpr.v21i3.27>
- Pourdowlat, G., Hejrati, R., & Lookzadeh, S. (2019). The effectiveness of relaxation training in the quality of life and anxiety of patients with asthma. *Advances in Respiratory Medicine*, 87(3), 146-151. <https://doi.org/10.5603/ARM.2019.0024>
- Prasanna, K., Sowmiya, K., & Dhileeban, C. (2015). Effect of Buteyko breathing exercise in newly diagnosed asthmatic patients. *International Journal of Medicine and Public Health*, 5(1), 77-81. <https://doi.org/10.4103/2230-8598.151267>
- Prem, V., Sahoo, R., & Adhikari, P. (2013). Comparison of the effects of Buteyko and pranayama breathing techniques on quality of life in patients with asthma : A randomized controlled trial. *Clinical Rehabilitation* 27(2), 133-141. <https://doi.org/10.1177/0269215512450521>
- Pushpa, K., & Sharma, D. (2018). Yoga as a complementary therapy improves pulmonary functions in patients of bronchial asthma: A randomized controlled trial. *National Journal of Physiology, Pharmacy and Pharmacology*, 8(12), 1704-1708. <https://doi.org/10.5455/njppp.2018.8.1033009112018>
- Ranjita, R., Hankey, A., Nagendra, H., & Mohanty, S. (2016). Yoga-based pulmonary rehabilitation for the management of dyspnea in coal miners with chronic obstructive pulmonary disease: A randomized controlled trial. *Journal of Ayurveda and Integrative Medicine*, 7, 158-166. <https://doi.org/10.1016/j.jaim.2015.12.001>
- Sabina, A., Williams, A., Wall, H., Bansal, S., Chupp, G., & Katz, D. (2005). Yoga intervention for adults with mild-to-moderate asthma: A pilot study. *Annals of Allergy, Asthma and Immunology*, 94, 543-548.
- Sakhaei, S., Sadagheyani, H., Zinalpoor, S., Markani, A., & Motaarefi, H. (2018). The impact of pursed-lips breathing maneuver on cardiac, respiratory, and oxygenation parameters in COPD patients. *Open Access Macedonian Journal of Medical Sciences*, 6(10), 1851-1856. <https://doi.org/10.3889/oamjms.2018.407>

- Sangeethalaxmi, M., & Hankey, A. (2022). Impact of yoga breathing and relaxation as an add-on therapy on quality of life, anxiety, depression and pulmonary function in young adults with bronchial asthma: A randomized controlled trial. *Journal of Ayurveda and Integrative Medicine*, 100546. <https://doi.org/10.1016/j.jaim.2022.100546>
- Satpathy, S., Kar, A., Purohit, K., & Manik, R. (2016). A comparative study of effect of yoga on symptoms and drug use in bronchial asthma. *IOSR Journal of Dental and Medical Sciences*, 15(8), 41-44. <https://doi.org/10.9790/0853-1508074144>
- Saunders, K., & White, J. (1965). Controlled trial of breathing exercises. *British Medical Journal* 2, 680-682.
- Shen, L., Zhang, Y., Su, Y., Weng, D., Zhang, F., Wu, Q., Chen, T., Li, Q., Zhou, Y., Hu, Y., Jiang, X., Jin, X., Zhang, A., & Li, H. (2021). New pulmonary rehabilitation exercise for pulmonary fibrosis to improve the pulmonary function and quality of life of patients with idiopathic pulmonary fibrosis: A randomized control trial. *Annals of Palliative Medicine*, 10(7), 7289. <https://doi.org/10.21037/apm-21-71>
- Singh, S., Soni, R., Singh, K., & Tandon, O. (2012). Effect of yoga practices on pulmonary function tests including transfer factor of lung for carbon monoxide (TLCO) in asthma patients. *Indian Journal of Physiology and Pharmacology*, 56(1), 63-68.
- Slader, C., Redel, H., Spencer, L., Belousova, E., Armour, C., Bosnic Anticevich, S., Thien, F., & Jenkins, C. (2006). Double blind randomised controlled trial of two different breathing techniques in the management of asthma. *Thorax*, 61(8), 651-656. <https://doi.org/10.1136/thx.2005.054767>
- Sodhi, C., Singh, S., & Bery, A. (2014). Assessment of the quality of life in patients with bronchial asthma, before and after yoga: A randomised trial. *Iranian Journal of Allergy, Asthma and Immunology*, 13(1), 55-60.
- Soni, R., Munish, K., Singh, K., & Singh, S. (2012). Study of the effect of yoga training on diffusion capacity in chronic obstructive pulmonary disease patients: A controlled trial. *International Journal of Yoga*, 5(2), 123-127. <https://doi.org/10.4103/0973-6131.98230>
- Sun, J., Yin, M., Shao, H., Li, Z., & Li, S. (2003). Effect of respiratory muscle gymnastics on lung function and quality of life in the old patients with chronic obstructive pulmonary disease [Chinese]. *Zhonghua Linchuang Kangfu Zazhi* 7, 3698-3699.
- Tang, W., Wang, M., & Lin, W. (2016). The clinical applying study of a novel breathing training manoeuvre in patients with COPD [Chinese]. *International Journal of Respiration [Guoji Huxi Zazhi]*, 36(19), 1458-1461.
- Turan, G., & Tan, M. (2020). The effect of yoga on respiratory functions, symptom control and life quality of asthma patients: A randomized controlled study. *Complementary Therapies in Clinical Practice*, 38, 101070. <https://doi.org/10.1016/j.ctcp.2019.101070>
- van Gestel, A., Kohler, M., Steier, J., Teschler, S., Russi, E., & Teschler, H. (2012). The effects of controlled breathing during pulmonary rehabilitation in patients with COPD. *Respiration*, 83(2), 115-124. <https://doi.org/10.1159/000324449>
- Vedanthan, P., Kasavalu, L., Mutthy, K., Duvall, K., Hall, M., Baker, S., & Nagarathna, S. (1998). Clinical study of yoga techniques in university students with asthma: A controlled study. *Allergy and Asthma Proceedings*, 19(1), 3-9.



- Vempati, R., Bijlani, R., & Deepak, K. (2009). The efficacy of a comprehensive lifestyle modification programme based on yoga in the management of bronchial asthma: A randomized controlled trial. *BMC Pulmonary Medicine*, 30(9), 37. <https://doi.org/10.1186/1471-2466-9-37>
- Wu, X., Hou, L., Bai, W., Peng, Y., Li, Y., Xie, Y., & Sun, Q. (2006). Effects of breathing training on quality of life and activities of daily living in elderly patients with stable severe chronic obstructive pulmonary disease. *Zhongguo kangfu yixue zazhi [Chinese Journal of Rehabilitation Medicine]*, 21(4), 307-310.
- Yamaguti, W., Claudino, R., Neto, A., Chammas, M., Gomes, A., & Salge, J. (2012). Diaphragmatic breathing training program improves abdominal motion during natural breathing in patients with chronic obstructive pulmonary disease: A randomised controlled trial. *Archives of Physical Medicine and Rehabilitation*, 93, 571-577. <https://doi.org/10.1016/j.apmr.2011.11.026>
- Yan, Q., Sun, Y., & Lin, J. (1996). A quantitative study on the effect of breathing exercises in improving respiratory muscle contraction. *Chung-Hua Nei Ko Tsa Chih [Chinese Journal of Internal Medicine]*, 35, 235-238.
- Yekefallah, L., Zohal, M., Keshavarzsarkar, O., Barikani, A., & Gheraati, M. (2019). Comparing the effects of upper limb and breathing exercises on six-minute walking distance among patients with chronic obstructive pulmonary disease: A three-group randomized controlled clinical trial. *Advances in Respiratory Medicine*, 87(2), 77-82. <https://doi.org/10.5603/ARM.2019.0013>
- Yuce, G., & Tasci, S. (2020). The effect of pranayama breathing technique on asthma control, pulmonary function and quality of life: A single-blind, randomized, controlled trial. *Complementary Therapies in Clinical Practice*, 101081. <https://doi.org/10.1016/j.ctcp.2019.101081>
- Zakerimoghadam, M., Tavasoli, K., Nejad, A., & Khoshkesht, S. (2011). The effect of breathing exercises on the fatigue levels of patients with chronic obstructive pulmonary disease. *Acta Medica Indonesiana*, 43(1), 29-33.
- Zhang, Z., Chen, R., Yang, Q., Li, P., Wang, C., & Zhang, Z. (2008). Effects of respiratory training in relation to respiratory pathophysiology on respiratory muscle function and exercise tolerance in chronic obstructive pulmonary disease patients [Chinese]. *Journal of Clinical Rehabilitative Tissue Engineering Research*, 12, 3966-3971.

### List of included systematic reviews

- Burgess, J., Ekanayake, B., Lowe, A., Dunt, D., Thien, F., Dharmage, S.C. (2011) Systematic review of the effectiveness of breathing retraining in asthma management. *Expert Review of Respiratory Medicine*, 5:6, 789-807. <https://doi.org/10.1586/ers.11.69>
- Hindelang, M., Kirsch, F., Leidl, R. (2020) Effectiveness of non-pharmacological COPD management on health-related quality of life - a systematic review. *Expert Review of Pharmacoeconomics & Outcomes Research*, 20:1, 79-91, <https://doi.org/10.1080/14737167.2020.1734455>
- Holland, AE., Hill, CJ., Jones, AY., McDonald, CF. Breathing exercises for chronic obstructive pulmonary disease. *Cochrane Database of Systematic Reviews* 2012, Issue 10. Art. No.: CD008250. <https://doi.org/10.1002/14651858.CD008250.pub2>
- Jayawardena, R., Ranasinghe, P., Ranawaka, H., Gamage, N., Dissanayake, D., Misra, A. Exploring the Therapeutic Benefits of Pranayama (Yogic Breathing): A Systematic Review. *International Journal of Yoga*. 2020 May-Aug;13(2):99-110. doi: 10.4103/ijoy.IJOY\_37\_19. Epub 2020 May 1. PMID: 32669763; PMCID: PMC7336946.
- Santino, TA., Chaves, GSS., Freitas, DA., Fregonezi, GAF., Mendonça, KMPP. Breathing exercises for adults with asthma. *Cochrane Database of Systematic Reviews* 2020, Issue 3. Art. No.: CD001277. <https://doi.org/10.1002/14651858.CD001277.pub4>
- Xu, S., Zhang, D., He, Q., Ma, C., Ye, S., Ge, L., Zhang, L., Liu, W., Chen, Z., Zhou, L. Efficacy of Liuzijue Qigong in patients with chronic obstructive pulmonary disease: A systematic review and meta-analysis. *Complement Ther Med*. 2022 May;65:102809. doi: 10.1016/j.ctim.2022.102809. Epub 2022 Jan 29. PMID: 35093513. <https://doi.org/10.1016/j.ctim.2022.102809>
- Yang, Y., Wei, L., Wang, S., Ke, L., Zhao, H., Mao, J., Li, J., Mao, Z. (2022) The effects of pursed lip breathing combined with diaphragmatic breathing on pulmonary function and exercise capacity in patients with COPD: a systematic review and meta-analysis. *Physiotherapy Theory and Practice*, 38:7, 847-857, <https://doi.org/10.1080/09593985.2020.1805834>
- Yang, ZY., Zhong, HB., Mao, C., Yuan, JQ., Huang, Y., Wu, XY., Gao, YM., Tang, JL. Yoga for asthma. *Cochrane Database of Systematic Reviews* 2016, Issue 4. Art. No.: CD010346. DOI: 10.1002/14651858.CD010346.pub2. <https://doi.org/10.1002/14651858.CD010346.pub2>
